# Supplementary material for: “Vaccination needs to be easy for the people, right ?”: a qualitative study of the roles of physicians and pharmacists regarding vaccination in Switzerland
Source: PubMed Central journal article supplement — BMJ Open. 2021 Dec 17;11(12):e053163. doi: 10.1136/bmjopen-2021-053163 (PMC8685942; doi:10.1136/bmjopen-2021-053163), 2021-12-17
Supplement: bmjopen-2021-053163.draft_revisions.pdf [file bmjopen-2021-053163.draft_revisions.pdf]

# BMJ Open

BMJ Open is committed to open peer review. As part of this commitment we make the peer review history of every article we publish publicly available.

When an article is published we post the peer reviewers' comments and the authors' responses online. We also post the versions of the paper that were used during peer review. These are the versions that the peer review comments apply to.

The versions of the paper that follow are the versions that were submitted during the peer review process. They are not the versions of record or the final published versions. They should not be cited or distributed as the published version of this manuscript.

BMJ Open is an open access journal and the full, final, typeset and author-corrected version of record of the manuscript is available on our site with no access controls, subscription charges or pay-per-view fees (<http://bmjopen.bmj.com>).

If you have any questions on BMJ Open's open peer review process please email [info.bmjopen@bmj.com](mailto:info.bmjopen@bmj.com)

# BMJ Open

## **“Vaccination needs to be easy for the people, right ?” : A Qualitative Study Examining the Roles of Physicians and Pharmacists Regarding Vaccination Counseling and Administration in Switzerland**

|                               |                                                                                                                                                                                                                                                                                                                                                                                                                                                                                                                                                                                                                                                                                                                                                                                                                                                                                                                                                                                                                                                                                                                               |
|-------------------------------|-------------------------------------------------------------------------------------------------------------------------------------------------------------------------------------------------------------------------------------------------------------------------------------------------------------------------------------------------------------------------------------------------------------------------------------------------------------------------------------------------------------------------------------------------------------------------------------------------------------------------------------------------------------------------------------------------------------------------------------------------------------------------------------------------------------------------------------------------------------------------------------------------------------------------------------------------------------------------------------------------------------------------------------------------------------------------------------------------------------------------------|
| Journal:                      | <i>BMJ Open</i>                                                                                                                                                                                                                                                                                                                                                                                                                                                                                                                                                                                                                                                                                                                                                                                                                                                                                                                                                                                                                                                                                                               |
| Manuscript ID                 | bmjopen-2021-053163                                                                                                                                                                                                                                                                                                                                                                                                                                                                                                                                                                                                                                                                                                                                                                                                                                                                                                                                                                                                                                                                                                           |
| Article Type:                 | Original research                                                                                                                                                                                                                                                                                                                                                                                                                                                                                                                                                                                                                                                                                                                                                                                                                                                                                                                                                                                                                                                                                                             |
| Date Submitted by the Author: | 24-May-2021                                                                                                                                                                                                                                                                                                                                                                                                                                                                                                                                                                                                                                                                                                                                                                                                                                                                                                                                                                                                                                                                                                                   |
| Complete List of Authors:     | Jusufoska, Meliha; University of Basel, University Department of Pharmaceutical Sciences; Kantonsspital Baselland Medizinische Universitätsklinik Standort Bruderholz, University Department of Medicine and Infectious Diseases Service<br>Abreu de Azevedo, Marta; University of Basel, University Department of Pharmaceutical Sciences; Kantonsspital Baselland Medizinische Universitätsklinik Standort Bruderholz, University Department of Medicine and Infectious Diseases Services<br>Tolic, Josipa; University of Basel, University Department of Pharmaceutical Sciences; Kantonsspital Baselland Medizinische Universitätsklinik Standort Bruderholz, University Department of Medicine and Infectious Diseases Services<br>Deml, Michael; Swiss TPH, Dept. Epidemiology & Public Health (EPH); Kantonsspital Baselland Medizinische Universitätsklinik Standort Bruderholz, University Department of Medicine and Infectious Diseases Services<br>Tarr, Philip ; Kantonsspital Baselland Medizinische Universitätsklinik Standort Bruderholz, University Department of Medicine and Infectious Diseases Services |
| Keywords:                     | IMMUNOLOGY, QUALITATIVE RESEARCH, EDUCATION & TRAINING (see Medical Education & Training), HEALTH SERVICES ADMINISTRATION & MANAGEMENT, Public health < INFECTIOUS DISEASES                                                                                                                                                                                                                                                                                                                                                                                                                                                                                                                                                                                                                                                                                                                                                                                                                                                                                                                                                   |
|                               |                                                                                                                                                                                                                                                                                                                                                                                                                                                                                                                                                                                                                                                                                                                                                                                                                                                                                                                                                                                                                                                                                                                               |

SCHOLARONE™  
Manuscripts

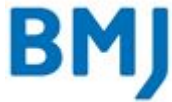

I, the Submitting Author has the right to grant and does grant on behalf of all authors of the Work (as defined in the below author licence), an exclusive licence and/or a non-exclusive licence for contributions from authors who are: i) UK Crown employees; ii) where BMJ has agreed a CC-BY licence shall apply, and/or iii) in accordance with the terms applicable for US Federal Government officers or employees acting as part of their official duties; on a worldwide, perpetual, irrevocable, royalty-free basis to BMJ Publishing Group Ltd ("BMJ") its licensees and where the relevant Journal is co-owned by BMJ to the co-owners of the Journal, to publish the Work in this journal and any other BMJ products and to exploit all rights, as set out in our [licence](#).

The Submitting Author accepts and understands that any supply made under these terms is made by BMJ to the Submitting Author unless you are acting as an employee on behalf of your employer or a postgraduate student of an affiliated institution which is paying any applicable article publishing charge ("APC") for Open Access articles. Where the Submitting Author wishes to make the Work available on an Open Access basis (and intends to pay the relevant APC), the terms of reuse of such Open Access shall be governed by a Creative Commons licence – details of these licences and which [Creative Commons](#) licence will apply to this Work are set out in our licence referred to above.

Other than as permitted in any relevant BMJ Author's Self Archiving Policies, I confirm this Work has not been accepted for publication elsewhere, is not being considered for publication elsewhere and does not duplicate material already published. I confirm all authors consent to publication of this Work and authorise the granting of this licence.

1  
2  
3  
4 1 “Vaccination needs to be easy for the people, right ?” : A Qualitative  
5  
6  
7 2 Study Examining the Roles of Physicians and Pharmacists Regarding  
8  
9  
10 3 Vaccination Counseling and Administration in Switzerland  
11  
12

13 4 Authors: Meliha Jusufoska<sup>1,2</sup>, Marta Abreu de Azevedo<sup>1,2</sup>, Josipa Tolic<sup>1,2</sup>, Michael J. Deml<sup>3,4,\*</sup>, Philip  
14  
15 5 E. Tarr <sup>1,\*</sup>, Swiss National Research Program NFP74 Vaccine Hesitancy  
16  
17  
18  
19  
20

21 7 **Affiliations:**

22  
23 8 <sup>1</sup> University Department of Medicine and Infectious Diseases Service, Kantonsspital Baselland, University  
24  
25 9 of Basel, Bruderholz, Switzerland  
26  
27  
28

29 10 <sup>2</sup> Pharmaceutical Care Research Group, Department of Pharmaceutical Sciences, University of Basel,  
30  
31 11 Petersplatz 14, 4001, Basel, Switzerland  
32

33 12 <sup>3</sup> Swiss Tropical and Public Health Institute (Swiss TPH), Socinstrasse 57, 4051, Basel, Switzerland  
34  
35

36 13 <sup>4</sup> University of Basel, Petersplatz 1, 4001, Basel, Switzerland  
37  
38  
39  
40  
41

42 15 \* these authors contributed equally to the manuscript  
43  
44

45 16 **Corresponding author:**

46  
47  
48 17 Philip E. Tarr, MD, University Dept. of Medicine and Infectious Diseases Service, Kantonsspital Baselland,  
49  
50 18 University of Basel, 4101 Bruderholz, Switzerland; Phone +41 (61) 436 2212, Fax +41 (61) 436 3670,  
51

52 19 [philip.tarr@unibas.ch](mailto:philip.tarr@unibas.ch)  
53  
54

55 20 **Word count:** 4575 words  
56  
57  
58  
59  
60

## 22 ABSTRACT

23 **Objective** The aim of this qualitative study was to gain further insight into professional stakeholders'  
24 perspectives on vaccination counselling and administration conducted in pharmacies and to further  
25 understand their views on physicians' and pharmacists' roles in increasing immunization rates.

26 **Design** We conducted semi-structured qualitative interviews. We coded and analyzed transcripts  
27 using thematic analysis.

28 **Setting** Face-to-face interviews took place in German- and French-speaking regions of Switzerland.

29 **Participants** We interviewed 14 key vaccination stakeholders including health authorities, heads of  
30 pharmacy management, and professional association boards. All participants had a medical or  
31 pharmaceutical background.

32 **Results** Three main themes emerged from the qualitative data: (1) Participants viewed pharmacists  
33 as competent to provide vaccination counseling and administration based on their university  
34 training; (2) inter-professional cooperation between physicians and pharmacists on vaccination  
35 topics is limited and should be improved; and (3) pharmacists play an important role in increasing  
36 immunization rates by facilitating vaccination access and through provision of vaccination  
37 counseling.

38 **Conclusion** By providing vaccination counseling and administering vaccines, pharmacists play an  
39 important public health role. Healthcare policies and health authorities should encourage more  
40 involvement of pharmacists and encourage inter-professional cooperation between physicians and  
41 pharmacists in order to improve vaccination counseling and increase immunization rates.

42 **Keywords:** Vaccination, Immunization Rates, Pharmacist, Physician, Stakeholder, Inter-  
43 professionalism

## 44 STRENGTHS AND LIMITATIONS OF THIS STUDY

- 45 1. The qualitative study design provides novel insights into the opinions of key Swiss experts  
46 with both medical and pharmaceutical backgrounds and allows us to gain a deeper  
47 understanding of the topic of vaccination in pharmacies from the participants' own  
48 perspectives.
- 49  
50 2. This study includes detailed insights into the views of a wide variety of key actors, by  
51 including stakeholders from German- and French-language regions of Switzerland, from  
52 public health, professional pharmacists and physicians organisations, and complementary  
53 medicine and biomedicine.
- 54  
55 3. The methodological approach to recruit only key Swiss experts on vaccination topics limits  
56 our results, because practicing physicians and pharmacists are under-represented in our  
57 study.
- 58  
59 4. Our results reflect the opinions of a limited number of experts and should be generalized  
60 with caution.

## 62 INTRODUCTION

63 Despite generally high vaccination rates in Switzerland, the Swiss Federal Office of Public Health  
64 (FOPH) has reported that vaccination coverage is not currently meeting public health targets to  
65 protect the population against measles, human papillomavirus (HPV), and influenza. [1-3] Insufficient  
66 immunization rates are not always simply a result of negative attitudes towards vaccination, a lack of  
67 reliable information, or vaccine hesitancy (VH); they can also result from inadequate access to

1  
2  
3 68 vaccination services. [4-8] For example, hard-to-reach populations, such as healthy adolescents with  
4  
5 69 no primary care physician, are often missed by healthcare systems. [9] Pharmacists have been  
6  
7 70 involved in vaccination for many years. [10] With their extended business hours and walk-in services,  
8  
9 71 pharmacies offer easy access to health care providers and immunization delivery. [11, 12] In recent  
10  
11 72 years, pharmacists in certain Western countries have become involved in offering vaccination  
12  
13 73 services by serving as vaccination advocates, facilitators and immunizers. [5, 13-16]  
14  
15  
16

17 74 Vaccination in pharmacies can increase access to immunizations and improve vaccination counseling.  
18  
19 [16, 17] For these reasons, pharmacists have been allowed and are encouraged to administer certain  
20  
21 75 vaccines as a key component of the 2015 Swiss National Vaccination Strategy. [4, 8] Additionally,  
22  
23 76 pharmacists are now increasingly expected to provide preventive health services, having been  
24  
25 77 attributed this role in the Swiss national law of medical professions. [18-20] In 22 of the 26 Swiss  
26  
27 78 cantons (states), community pharmacists can currently administer vaccines (Table 1-Supplemental  
28  
29 79 Material). [21] This requires (since 2011) them to have obtained specific pre- and post-graduate  
30  
31 80 training, an appropriate federal certificate, [22] and there is a compulsory continuing education  
32  
33 81 requirement. [16, 18, 23, 24]  
34  
35 82  
36  
37

38 83 Cooperation between physicians and pharmacists has the potential to facilitate access to vaccination  
39  
40 84 and other health services and to improve the quality of the care delivered. [25-27] However,  
41  
42 85 vaccination counseling and administration in pharmacies has previously been met with resistance by  
43  
44 86 physicians in the US and other countries, [13, 28] with physicians expressing doubts that pharmacists  
45  
46 87 are qualified to deal with acute adverse (i.e. allergic) reactions to vaccines, but also related to fears  
47  
48 88 of reduced physician revenue when patients obtain vaccination in pharmacies rather than physicians'  
49  
50 89 offices. Conversely, Swiss pharmacists have been critical of physicians being allowed to sell  
51  
52 90 medication directly to the patient in their offices (a practice referred to in Switzerland as "self-  
53  
54 91 dispensation" of medication by physicians) in most of Switzerland, thereby reducing revenue from  
55  
56 92 drug sales in pharmacies. [29, 30]  
57  
58  
59  
60

1  
2  
3 93 Since vaccination services overlap between the fields of activity of physicians and pharmacists, and  
4  
5 94 due to the potential for friction between these professional groups around issues of revenue and  
6  
7 95 authority, this topic merits further study, particularly in Switzerland where the opportunity to  
8  
9 96 vaccinate in pharmacies is relatively recent and pharmacists have a new role regarding vaccination.  
10  
11  
12 97 [19] Since studies have shown that inter-professional interactions between pharmacists and general  
13  
14 98 practitioners could be considerably improved, [25, 26] it is important to understand the impact of the  
15  
16 99 above mentioned inter-professional political issues on cooperation between physicians and  
17  
18  
19 100 pharmacists.

20  
21 101 Here we provide a detailed qualitative characterization of the perspectives of key physician and  
22  
23 102 pharmacy stakeholders from professional societies, public health departments, and community  
24  
25 103 pharmacy boards on professional training, vaccination counseling and administration, and the  
26  
27  
28 104 respective roles and competencies of physicians and pharmacists.

## 31 105 **METHODS**

32  
33  
34 106 We conducted this study in the context of the Swiss National Research Program 74 (NRP74) on  
35  
36 107 vaccine-hesitant patients and physicians in Switzerland. [6, 31] The study was approved by the local  
37  
38 108 ethics committee (Ethikkommission Nordwest- und Zentralschweiz). We obtained informed consent  
39  
40 109 from all participants.

41  
42  
43 110  
44  
45 111 We selected participants through purposive sampling. The principal investigator (author 5) recruited  
46  
47 112 all participants via email. Participants included stakeholders with a medical or pharmaceutical  
48  
49 113 degree, including public health authorities, heads of community pharmacy management boards, and  
50  
51 114 heads of professional medical and pharmaceutical associations (Table 2). A total of 20 stakeholders  
52  
53 115 were contacted, of whom 1 declined to participate due to general lack of time, and 5 were unable to  
54  
55 116 participate due to constraints related to the coronavirus pandemic. We interviewed each participant  
56  
57  
58  
59  
60



1  
2  
3 117 once, with one interview conducted with two participants simultaneously. To ensure anonymity, we  
4  
5 118 use pseudonyms throughout. Participants' exact professional affiliations are not displayed.

6  
7 119  
8  
9 120 We designed a semi-structured qualitative interview guide based on previous projects of the NRP74  
10  
11 121 vaccine hesitancy program [7, 32] and finalized it after several pilot interviews and revisions by team  
12  
13 122 members. The guide included 22 questions aimed at capturing in-depth insights about participants'  
14  
15 123 perspectives on professional training and competence, vaccination counseling in pharmacies,  
16  
17 124 immunization rates, administration modalities, vaccination costs, and mandatory vaccination. Several  
18  
19 125 interviewees requested and received the interview guide from us in advance.  
20  
21 126

22  
23  
24  
25 127 We conducted interviews with participants in the German- and French-speaking regions of  
26  
27 128 Switzerland from February to April 2020. Two senior pharmacy students trained in qualitative  
28  
29 129 methods conducted the interviews (author 1 and author 2). All interviews were audio-recorded and  
30  
31 130 transcribed verbatim. We transcribed the interviews in the language of utterance (German or  
32  
33 131 French). The French interviews were then translated into German by a native bilingual research team  
34  
35 132 member. We regularly discussed data interpretation in the team during the process of transcription.  
36  
37 133 After several rounds of in-depth readings, we developed a coding scheme. Coding allows data to be  
38  
39 134 classified for subsequent, systematic analyses. We grouped similar codes into themes and organized  
40  
41 135 data into three main themes: (1) competence of various health care providers (HCP) to provide  
42  
43 136 vaccination counseling, (2) roles of physicians and pharmacists in vaccination counseling, and (3)  
44  
45 137 contribution of physicians and pharmacists to increasing immunization rates in Switzerland.  
46  
47  
48  
49

50 138  
51  
52  
53 139 Transcripts were coded and analyzed using thematic analysis, following Braun and Clarke's 6 phases  
54  
55 140 in order to organize and analyze the data. [33] To structure and support the analysis, we used the  
56  
57 141 Framework Method by Gale and colleagues. [34] In line with the Framework Method, the analysis of  
58  
59 142 the coding scheme and themes was reviewed independently by other group members. The research

1  
2  
3 143 team discussed any discrepancies in coding. We used the Consolidated criteria for Reporting  
4  
5 144 Qualitative research checklist (COREQ) as guidelines for reporting qualitative results. [35] All quotes  
6  
7 145 have been translated into English. In the following sections, we will use the term clients to refer to  
8  
9 146 patients and clients, unless directly citing participants.  
10  
11  
12

13 147

## 148 RESULTS

19 149 Study participants had a medical (N=8) or pharmaceutical (N=6) professional background (Table 2).  
20  
21 150 Two participants with a medical background had additional training in complementary and  
22  
23 151 alternative medicine (CAM). The interviews lasted from 30 to 60 minutes, with an average of 44  
24  
25 152 minutes.  
26  
27

28  
29 153 We first illustrate who participants considered to be competent to provide vaccination counselling  
30  
31 154 and what formal requirements this should entail. Second, we describe participants' perspectives on  
32  
33 155 the roles of the two main actors in vaccination counselling in Switzerland: physicians and  
34  
35 156 pharmacists. Third, we examine participants' suggestions for how physicians and pharmacists could  
36  
37 157 potentially contribute to increasing vaccination rates.  
38  
39

40 158

41  
42 159 *Table 2: Characteristics of participants*  
43  
44

| Pseudonym          | Language Region | Professional affiliation           | Occupation |
|--------------------|-----------------|------------------------------------|------------|
| <b>Ms. Tanner</b>  | German          | Swiss Pharmacists Association      | Pharmacist |
| <b>Ms. Thies</b>   | German          | Swiss Pharmacists Association      | Pharmacist |
| <b>Mr. Tschopp</b> | German          | Swiss Young Pharmacists Group      | Pharmacist |
| <b>Mr. Nagy</b>    | French          | Head of a community pharmacy chain | Pharmacist |

|                         |        |                                                        |            |
|-------------------------|--------|--------------------------------------------------------|------------|
| <b>Ms. Zehnder</b>      | French | Chief pharmacist in public health department           | Pharmacist |
| <b>Ms. Bertschi</b>     | German | Chief pharmacist in public health department           | Pharmacist |
| <b>Mr. Camenzind</b>    | German | Swiss Federal vaccination commission                   | Physician  |
| <b>Ms. Felder</b>       | German | Swiss association of complementary medicine physicians | Physician  |
| <b>Mr. Tiefenbacher</b> | German | Swiss association of paediatricians                    | Physician  |
| <b>Ms. Dahl</b>         | German | Swiss Society for General and Internal Medicine        | Physician  |
| <b>Mr. Zeller</b>       | German | Major complementary medicine hospital                  | Physician  |
| <b>Mr. Müller</b>       | German | Swiss Medical Association                              | Physician  |
| <b>Ms. Lehmann</b>      | German | Chief physician in public health department            | Physician  |
| <b>Mr. Meyer</b>        | French | Chief physician in public health department            | Physician  |

160

## 161 **Healthcare professionals who are competent to provide vaccination**

### 162 **counselling**

163 We asked participants which healthcare professionals were competent to provide vaccination  
 164 counseling. All participants agreed that vaccination topics were "complex issues" and argued that  
 165 sound expert knowledge about the different vaccines, their efficacy, safety, and how to deal with  
 166 complications was required. Participants also emphasized the importance of knowing one's "own  
 167 limits" and of seeking expert advice when uncertainties arise. Furthermore, they discussed how an  
 168 interest in the topic of vaccinations and a solid knowledge base was a prerequisite for providing

1  
2  
3 169 scientific and objective advice and to be able to answer “tough” questions and provide in-depth  
4  
5 170 information.

6  
7  
8 171 According to the participants’ descriptions of competence, pharmacists and physicians best meet  
9  
10 172 criteria for competent vaccination counseling. As Ms. Tanner (Pharmacist, Swiss Pharmacists  
11  
12 173 Association), explained, physicians and pharmacists both are qualified to provide vaccination  
13  
14 174 counseling: "All things considered, to have a really good conversation with the client (...), for me, an  
15  
16 175 academic background is necessary to have a good understanding of the information, of the  
17  
18 176 immunology, so that you can explain a vaccine correctly. And that is why I feel that if a client wants  
19  
20 177 to be informed in-depth, vaccination counseling currently belongs in the hands of physicians and  
21  
22 178 pharmacists."

23  
24  
25  
26 179  
27  
28  
29 180 Some of the participants explained that, in addition to physicians and pharmacists, other medical  
30  
31 181 professionals who do not have university training, such as nurses, medical practice assistants, and  
32  
33 182 pharmacy assistants, could also be competent to provide appropriate vaccination advice. Ms.  
34  
35 183 Lehmann (chief physician, public health department) expressed that HCPs with various backgrounds  
36  
37 184 who obtain additional vaccination training are competent to provide high quality vaccination  
38  
39 185 counseling. Participants agreed that HCPs without university training could, at the very least, relieve  
40  
41 186 physicians and pharmacists by evaluating clients’ vaccination status, asking certain triage questions  
42  
43 187 or administering vaccines.

44  
45  
46  
47 188  
48  
49  
50 189 Only one participant, Mr. Zeller (physician, Swiss CAM hospital), saw vaccination counseling and  
51  
52 190 administration as being outside of pharmacists’ area of expertise. He explained that pharmacists who  
53  
54 191 vaccinate would "interfere" with the job of the physician, arguing that pharmacists would vaccinate  
55  
56 192 with other intentions; in his view, profit would be pharmacists’ primary focus, meaning that there  
57  
58 193 would be a possible conflict of interest. He said that during the physician-patient encounter, the

1  
2  
3 194 primary goal is not selling and administering a vaccine, but to counsel the patient, to aid them in  
4  
5 195 their decision-making process, and to embed vaccination in the medical check-up visit.  
6  
7

## 8 196 Formal requirements to become competent 9

10  
11 197 When discussing how physicians and pharmacists acquired their vaccination counseling and  
12  
13 198 administration competence, participants considered HCPs' university education, post-graduate  
14  
15 199 training, and continuing education. Participants described how all physicians are allowed to vaccinate  
16  
17 200 after post-graduate training to obtain a medical specialist title. In contrast, pharmacists can only  
18  
19 201 vaccinate clients by meeting 2 conditions: 1) completing specific post-graduate training course  
20  
21 202 leading to a certificate of competence for vaccination; and 2) fulfilling regular continuing education  
22  
23 203 requirements. Both physician and pharmacist participants saw room for improved quality of  
24  
25 204 vaccination counseling for physicians, by increasing the content of their pre-graduate vaccination  
26  
27 205 training.  
28  
29

30  
31  
32 206 All pharmacists agreed that vaccine education during pharmaceutical university training in  
33  
34 207 Switzerland was excellent, especially since 2016 when the vaccination content of the curriculum was  
35  
36 208 updated. According to Mr. Tschopp (pharmacist, Swiss Young Pharmacists Group), however, there is  
37  
38 209 "room for improvement" regarding communication training for both physicians and pharmacists.  
39  
40

41  
42 210 Opinions regarding coverage of vaccination topics in medical school differed. Most participants felt  
43  
44 211 that physicians received only limited and "superficial" training on vaccination. According to Mr.  
45  
46 212 Tiefenbacher (physician, Swiss association of paediatricians), vaccination is a topic that receives only  
47  
48 213 "marginal" attention in medical school. He pointed out: "I cannot remember many vaccine-specific  
49  
50 214 lectures [in medical school], let alone practical courses. (...) That is for sure. And whether it is  
51  
52 215 different now, in 2020 (...), I do not think so. When I talk to medical students or have master students  
53  
54 216 with me who are in their fourth year [of medical school], or when I do one-on-one student tutoring,  
55  
56 217 vaccination for them is still a closed book. I assume that probably has not changed much today."  
57  
58  
59  
60

1  
2  
3 218 In terms of post-graduate training, according to both physician and pharmacist participants,  
4  
5 219 pharmacists who have acquired the post-graduation vaccination certificate have obtained  
6  
7 220 “outstanding and stringent” training. In contrast, regarding post-graduate medical residency training,  
8  
9  
10 221 some participants considered that the vaccination issues were not discussed in enough detail. Mr.  
11  
12 222 Tiefenbacher (physician, Swiss association of paediatricians) expressed wishing to be confronted with  
13  
14 223 vaccination questions "from the beginning on and more frequently" during post-graduate residency  
15  
16 224 training.

17  
18  
19 225 Regarding continuing education, Swiss pharmacists must undergo continuing education in order to  
20  
21 226 maintain their vaccination certification. Participants felt that this sufficiently ensured pharmacists’  
22  
23 227 competence. In contrast, physicians do not have to obtain any continuing vaccine education. One  
24  
25 228 pharmacist (Mr. Nagy, pharmacist, head of a community pharmacy chain) argued how it is in the  
26  
27 229 interest of physicians to receive additional training: “It is a question of individual will. This is the  
28  
29 230 advantage pharmacists have over physicians.” However, Mr. Meyer (chief physician, public health  
30  
31 231 department) considered that regarding formal requirements for vaccination administration, too  
32  
33 232 much is required of pharmacists, whereas too little is demanded of physicians. In his view, the rules  
34  
35 233 for continuing education should be the same for both professions.  
36  
37  
38  
39  
40  
41  
42

### 235 **Inter-professional cooperation between physicians and pharmacists**

43  
44  
45  
46 236 In this section, we discuss stakeholders’ different perspectives on inter-professional cooperation  
47  
48 237 between physicians and pharmacists when it comes to vaccination, a matter on which the interviews  
49  
50 238 revealed considerable disagreement. We illustrate the stakeholders’ characterization of inter-  
51  
52 239 professional cooperation and how it should best be organized.

53  
54  
55 240 According to most participants, ample communication and good working relationships on the same  
56  
57 241 professional level between physicians and pharmacists are important for collaboration to be  
58  
59 242 effective. As stated by the stakeholders from both disciplines, there is an unmet need for better

1  
2  
3 243 professional cooperation between physicians and pharmacists. Complex situations and uncertainties  
4  
5 244 regarding vaccine supply, appropriate indications, and complications could thus be resolved  
6  
7 245 together. Furthermore, incorporation of different physician and pharmacist perspectives would  
8  
9 246 ultimately improve the quality of care. Participants expressed how inter-professional cooperation  
10  
11 247 could allow “better access to and understanding of vaccination.” Participants agreed that a primary  
12  
13 248 goal of inter-professional cooperation would be to put the patient at the center. Mr. Müller  
14  
15 249 (physician, Swiss Medical Association) succinctly summarized this point by arguing that vaccination  
16  
17 250 needs to be “easy for the people, right? That's the point.”  
18  
19  
20  
21 251 Furthermore, participants argued how physicians and pharmacists should pursue common goals,  
22  
23 252 such as providing the best possible medical care and improving vaccination rates. For example, Ms.  
24  
25 253 Tanner (pharmacist, Swiss Pharmacists Association) stated, “[It's] not only the pharmacists. All actors  
26  
27 254 are important here. We have to assure somehow that we all pull together. That we respond to the  
28  
29 255 level of knowledge of patients or vaccine-hesitant people so that they can be convinced, and  
30  
31 256 vaccination rates can be increased and health care costs reduced.”  
32  
33  
34  
35 257 However, participants described how, at present, inter-professional cooperation was mostly non-  
36  
37 258 existent. According to Ms. Dahl (physician, Swiss Society for General and Internal Medicine) the  
38  
39 259 reason for the lack of inter-professional cooperation was clear: “Cooperation between physicians and  
40  
41 260 pharmacists? I don't think there is any communication, sorry [laughs].” Mr. Meyer (chief physician,  
42  
43 261 public health department) explained how he felt that physicians and pharmacists “put up with each  
44  
45 262 other” but that there was “no cooperation.” Mr. Müller (physician, Swiss Medical Association) even  
46  
47 263 described inter-professionalism as an “illusion”.  
48  
49  
50  
51 264  
52  
53 265 According to participants, pharmacists' ability to vaccinate might be an important source of friction  
54  
55 266 for some physicians and thus the lacking inter-professional cooperation. Mr. Zeller (physician, major  
56  
57 267 swiss CAM hospital) stated that “prevention belongs in the hands of the physician.” This sentiment  
58  
59 268 was echoed by other physician stakeholders. A common stereotype among physicians, according to  
60

1  
2  
3 269 both medical and pharmaceutical stakeholders, was that pharmacists acted "like little physicians"  
4  
5 270 when they vaccinate or provide vaccination counseling. Another sentiment participants described  
6  
7 271 involved physicians having a "fear" of pharmacists overstepping their professional roles, which might  
8  
9  
10 272 bring physicians in general to develop a "competitive" attitude with pharmacists. Participants  
11  
12 273 explained how there was a perception that pharmacists were "taking something away" from  
13  
14 274 physicians by being allowed to vaccinate.

15  
16 275 Mr. Tiefenbacher (physician, Swiss association of paediatricians) explained this "skepticism" of  
17  
18 276 physicians towards pharmacists by detailing how vaccination was often the only contact between the  
19  
20 277 family physician and their healthy patients and that vaccination in pharmacies carried the potential  
21  
22 278 to eliminate physician-patient contact entirely. He clarified that physicians' skepticism was  
23  
24 279 attributable to the fact that pharmacists would try to sell "lots of things" in addition to vaccinations,  
25  
26 280 since pharmacies nowadays resemble "general stores".  
27

28  
29  
30 281  
31  
32 282 Other participants stated that pharmacies were merely "an additional service" to the already existing  
33  
34 283 ones. Mr. Nagy (pharmacist, head of a community pharmacy chain) explained: "Pharmacies provide  
35  
36 284 care to individuals who have no family physician, who do not regularly see a physician, or have no  
37  
38 285 contact with any medical professional. The only medical profession with which they have contact is  
39  
40 286 the pharmacist. This will only *increase* immunization rates. There is no competition there, quite the  
41  
42 287 opposite."  
43

44  
45 288 Mr. Tschopp (pharmacist, Swiss Young Pharmacists Group) similarly pointed to vaccination in  
46  
47 289 pharmacies as "the best way" to reach people who never consult a physician.

48  
49  
50 290 Ms. Bertschi (chief pharmacist, public health department) explained that pharmacists should apply  
51  
52 291 all knowledge that they acquired during their training and that could be legally provided. Vaccination  
53  
54 292 being included in pharmacists' training was an obvious area of pharmacists' expertise. Furthermore,  
55  
56 293 all pharmacist participants stated that pharmacists, as trained HCPs, increasingly are considered key  
57  
58 294 providers of preventive medicine in Switzerland.  
59  
60



1  
2  
3 295  
4  
5 296 To improve the relationships between physicians and pharmacists, Mr. Nagy (pharmacist, head of a  
6  
7 297 community pharmacy chain) argued that joint workshops on vaccination topics for physicians and  
8  
9 298 pharmacists should be arranged. Mr. Tschopp (pharmacist, Swiss Young Pharmacists Group)  
10  
11 299 proposed joint social events to help physicians and pharmacists get to know each other better. Ms.  
12  
13 300 Felder (physician, association of CAM physicians) echoed this thought, "I think that inter-professional  
14  
15 301 cooperation can be fruitful. Together is always better than against each other, right?"  
16  
17 302 However, two participants felt that further cooperation was not necessary. Mr. Zeller (physician,  
18  
19 303 major CAM hospital) explained that this would lead to "complicate" rather than simplify matters.  
20  
21 304 According to him, pharmacist-physician cooperation would lead to difficulties in defining who is in  
22  
23 305 charge and responsible for vaccination decisions. Ms. Bertschi (chief pharmacist, public health  
24  
25 306 department) also expressed skepticism: "Either the physician or pharmacist vaccinates. I do not see  
26  
27 307 much inter-professional cooperation here."  
28  
29  
30  
31  
32  
33  
34

### 309 Self-dispensation of medication in physicians' offices as a "counterpart" to 310 vaccination in pharmacies

311 Participating stakeholders discussed physicians' practice of selling medication in their offices directly  
312 to their patients (self-dispensation), thereby generating significant financial revenue, potentially at  
313 the disadvantage of the local pharmacy. On the other hand, vaccination in pharmacies might  
314 generate revenue for the pharmacy, potentially disadvantaging local office physicians.

315  
316 Several physician stakeholders reported that physicians and pharmacists should have "equal rights"  
317 by arguing that self-dispensation by physicians should be allowed in Swiss cantons where vaccination  
318 in pharmacies is allowed. Some pharmacists, however, noted that this was already largely the case.

1  
2  
3 319 Cantons with liberal laws on self-dispensation by physicians typically also promote vaccination in  
4  
5 320 pharmacies.

6  
7 321  
8  
9  
10 322 Some pharmacists stated that self-dispensation and vaccination in pharmacies could not be directly  
11  
12 323 compared because vaccination in pharmacies was based on compulsory postgraduate training and  
13  
14 324 quality assurance requirements, whereas no further educational requirements are imposed on "self-  
15  
16 325 dispensing" physicians. Mr. Tschopp (pharmacist, Swiss Young Pharmacists Group) criticized this:  
17  
18 326 "This is all political. Self-dispensation is an unregulated system that is wildly proliferating in doctors'  
19  
20 327 offices. In contrast, vaccination in pharmacies is tightly regulated, and physicians and the authorities  
21  
22 328 keep a close eye on us. It's about economic privileges."  
23  
24

25 329  
26  
27 330 Despite the mentioned discrepancies, both physician and pharmacist participants were overall  
28  
29 331 confident that cooperation between the two professions will improve. However, participants  
30  
31 332 discussed how pharmacists should not "push" and should "proceed in small steps," because it is  
32  
33 333 important that "trust must be built up and physicians must not get angry." This view was expressed  
34  
35 334 by both physician and pharmacist stakeholders.  
36  
37  
38

39 335

### 40 41 336 **Vaccination in pharmacies as a strategy to increase vaccination rates**

42  
43  
44  
45 337 We asked participants about the extent to which physicians and pharmacists could play roles in  
46  
47 338 increasing vaccination rates. Stakeholders explained that physicians and pharmacists play a key role  
48  
49 339 in this regard by providing vaccine information to patients and clients. Ms. Zehnder (chief  
50  
51 340 pharmacist, public health department) explained: "You have to provide people with information,  
52  
53 341 awareness, and responsibility, without the specter of fear." Participants described it being essential  
54  
55 342 to inform patients and clients "skillfully" so that the advice does not cause resistance. Physicians and  
56  
57 343 pharmacists often face difficult questions on vaccination and need to take sufficient time for  
58  
59  
60

1  
2  
3 344 counseling such clients. Providers should face up to "untruths," misinformation, and outdated  
4  
5 345 information. Some stakeholders believed that misinformation leads to the development of  
6  
7 346 "vaccination sceptics" or "vaccine-hesitant" people. Mr. Meyer (chief physician, public health  
8  
9 347 department) argued how HCPs collectively needed to prevent this "minority" from "setting the  
10  
11 348 tone." Participants argued that it was important to educate vaccine-hesitant groups specifically. Mr.  
12  
13 349 Müller (physician, Swiss Medical Association) and Ms. Tanner (pharmacist, Swiss Pharmacists  
14  
15 350 Association) mentioned motivational interviewing techniques to better inform clients and guide  
16  
17 351 them towards their vaccine decisions. For Mr. Tschopp (pharmacist, Swiss Young Pharmacists Group),  
18  
19 352 vaccination counseling required an "emotional and trusting" relationship between pharmacists and  
20  
21 353 their clients. In his view, by providing correct and easily understandable information, the number of  
22  
23 354 people willing to be vaccinated would increase.

24  
25  
26  
27  
28  
29 355 Similar to previous qualitative research with CAM physicians in Switzerland [7], two physicians  
30  
31 356 specialized in complementary medicine stated that increasing vaccination rates in Switzerland is not  
32  
33 357 a priority for them. Ms. Felder (physician, association of CAM physicians) explained that if the patient  
34  
35 358 "had good reasons not to be vaccinated," she would not try to persuade them to get vaccinated just  
36  
37 359 to increase vaccination rates. Rather, she argued that by providing "transparent" and  
38  
39 360 "individualized" vaccination counseling, patients should be able to make a more informed  
40  
41 361 vaccination decision. In her view, this will ultimately lead to increased vaccination rates. Mr. Zeller  
42  
43 362 (physician, major CAM hospital) put it bluntly: "I treat patients and not vaccination rates. My primary  
44  
45 363 goal is to protect those [with vaccines] who want to be protected, and to counsel them as objectively  
46  
47 364 as possible. Those who don't want to be protected: well, they can do this, it's their own  
48  
49 365 responsibility."

50  
51  
52  
53  
54 366 Finally, pharmacy stakeholders suggested that different regulations in the Swiss cantons (states)  
55  
56 367 should be harmonized. Ms. Tanner (pharmacist, Swiss Pharmacists Association) stated: "Each canton  
57  
58  
59  
60

1  
2  
3 368 has different rules for vaccination in pharmacies - this makes no sense. The goal clearly is to increase  
4  
5 369 vaccination rates in the whole country.”  
6  
7

8 370  
9

## 11 371 **DISCUSSION**

12  
13  
14  
15 372 In this study, we provide a detailed characterization of key Swiss medical and pharmaceutical  
16  
17 373 stakeholders' perspectives on vaccination in pharmacies. Stakeholders viewed both physicians and  
18  
19 374 pharmacists as competent to provide vaccination counseling. By providing low threshold access to  
20  
21 375 vaccination counseling, pharmacists play an important public health role, and vaccine administration  
22  
23 376 in pharmacies increases vaccination rates. However, stakeholders noted only limited professional  
24  
25 377 cooperation between pharmacists and physicians on vaccination and recommended improving  
26  
27 378 collaboration.  
28  
29

30  
31 379 The results of this study show how physicians and pharmacists in Switzerland serve as major actors  
32  
33 380 for providing high quality vaccination counseling and administering vaccines. This is in line with  
34  
35 381 previous studies. [10, 13, 17, 36, 37] For example, Harding et al. (2004) argue how pharmacists have  
36  
37 382 in-depth knowledge of physicochemical properties of drugs and vaccines, of pharmacology,  
38  
39 383 pharmacokinetics, drug interactions, and adverse drug effects. [38, 39] Our stakeholders discussed  
40  
41 384 extensive pre- and post-graduate training as a key prerequisite for pharmacists' vaccination  
42  
43 385 competence. Schaffer et al. (2008) point out how pharmacists' willingness to complete additional  
44  
45 386 post-graduate vaccination training demonstrates their commitment and high level of interest in the  
46  
47 387 topic of vaccination. [40] Previous authors recorded that pharmacy students in Switzerland receive  
48  
49 388 more hours of training on vaccination topics as part of their curriculum than medical students. [24]  
50  
51 389 Several of our participants mentioned this as evidence that pharmacists are well prepared for  
52  
53 390 vaccination counseling and administration, perhaps even more so than physicians.  
54  
55  
56  
57  
58  
59  
60

1  
2  
3 391 Our results document a considerable potential for tension between physicians and pharmacists on  
4  
5 392 the topic of vaccination. In a 2014 report from Ireland, general practitioners expressed concern  
6  
7 393 about pharmacists vaccinating, questioning their professional competence and ability to deal with  
8  
9 394 vaccine-related complications in the pharmacy. [28] Interestingly, most Swiss physician stakeholders  
10  
11 395 were supportive of vaccination in pharmacies as an important addition to vaccination in physicians'  
12  
13 396 offices. This could be interpreted as a favorable change in interprofessional attitudes in recent years,  
14  
15 397 with a welcome emphasis on physicians' and pharmacists' shared goal of achieving success for  
16  
17 398 national immunization programs by increasing vaccination rates. Nevertheless, stakeholders also  
18  
19 399 mentioned concerns about pharmacists who vaccinate, potentially interfering with the financial  
20  
21 400 wellbeing of physicians, by taking customers and therefore revenue away from physicians. This is in  
22  
23 401 line with previous reports. [13, 28] The direct comparison by our stakeholders of selling medication  
24  
25 402 by physicians in practice with vaccination in pharmacies was an interesting observation that has not  
26  
27 403 previously been documented. Pharmacists' concerns about loss of income and authority has also  
28  
29 404 been recorded in the US. [41] Importantly, selling medication constitutes a significant source of  
30  
31 405 revenue for "self-dispensing" physicians, representing the second largest distribution channel in the  
32  
33 406 Swiss drug market. [19, 42] In cantons where physician self-dispensation is allowed, the number of  
34  
35 407 pharmacies is lower than in the other cantons. [30]  
36  
37  
38  
39  
40  
41 408 Our findings underline the importance of considering financial aspects and highlight the extent to  
42  
43 409 which such decisions are politically charged and likely need to be resolved at a higher political level.  
44  
45 410 As the Swiss Federal Office of Public Health mentioned in a 2016 report, inter-professional  
46  
47 411 cooperation might meet fewer obstacles in cantons without self-dispensation of medicines by  
48  
49 412 physicians. [19, 29] In addition, the perceived potential for financial competition between physicians  
50  
51 413 and pharmacists in the private sector may provide a possible explanation for the currently limited  
52  
53 414 degree of cooperation between these professional groups.  
54  
55  
56  
57  
58 415 In line with a previous report, [27] study participants discussed how inter-professional cooperation in  
59  
60 416 the field of vaccination is likely to facilitate access to vaccination information and delivery, [13, 17]

1  
2  
3 417 heightened awareness concerning vaccinations, and, consequently, increased immunization rates. [9,  
4  
5 418 43, 44] This may concern particularly people with previously little contact with healthcare systems,  
6  
7 419 such as adolescents and healthy adults who have no regular physician or socio-economically  
8  
9 420 disadvantaged groups. [17, 39] Pharmacy and physician stakeholders underscored how active  
10  
11 421 communication and the provision of high quality information on vaccination by the provider  
12  
13 422 increases vaccination rates. This is in keeping with previous observations, such as those of  
14  
15 423 Grabenstein et al (1998) who found that patients are more likely to be vaccinated if they were  
16  
17 424 approached actively by the provider. [13] Active initiation of the conversation by the provider, and  
18  
19 425 the use of motivational interviewing (pioneered by Rollnick et al. [45]) may be useful to respond to  
20  
21 426 patient needs. [46] Motivational interviewing has already been applied in the field of vaccination and  
22  
23 427 has successfully been used to increase vaccination intention and vaccination rates by both  
24  
25 428 pharmacists [46] and physicians. [47, 48]

## 30 429 **STRENGTHS AND LIMITATIONS**

31  
32  
33  
34 430 Strengths of this study include a qualitative approach, which allowed us to gain a deeper  
35  
36 431 understanding of the topic of vaccination in pharmacies from the participants' own perspectives. Our  
37  
38 432 results provide novel insights into the opinions of key Swiss experts with both medical and  
39  
40 433 pharmaceutical backgrounds. This is an understudied aspect in the field of vaccination services. By  
41  
42 434 including stakeholders from German- and French-language regions of Switzerland, from public  
43  
44 435 health, professional pharmacists and physicians organisations, complementary medicine and  
45  
46 436 biomedicine, we obtained detailed insights into the views of a wide variety of key actors.

47  
48  
49  
50 437 Qualitative studies have limitations. Our results reflect the opinions of a limited number of experts  
51  
52 438 and should be generalized with caution. For qualitative interviewing, the interviewer effect [6] and  
53  
54 439 the social desirability bias [49] may affected the information obtained. Given that our data was  
55  
56 440 collected in the German- and French-speaking regions of Switzerland, translation of interviews into  
57  
58 441 English might have altered the meaning of some statements due to language-specific nuances. That

1  
2  
3 442 being said, language-related issues were discussed among the multilingual team throughout data  
4  
5 443 analysis. These limitations can be addressed by including our study findings into future quantitative  
6  
7 444 research that aims at studying similar issues on a wider scale.  
8  
9

## 10 445 **CONCLUSION**

11  
12  
13  
14 446 Our results suggest that promoting the integration of pharmacists as vaccine counselors and vaccine  
15  
16 447 administrators should be considered in order to maintain successful national immunization  
17  
18 448 programs. Health policymakers should consider more actively encouraging inter-professional  
19  
20 449 cooperation between physicians and pharmacists which currently seems limited in Switzerland and  
21  
22 450 elsewhere. [27] Despite the inclusion of pharmacists as primary care providers by the Swiss National  
23  
24 451 Vaccination Strategy [4, 8] participants criticized the lack of uniform regulation for vaccination in  
25  
26 452 pharmacies throughout Switzerland. Active initiation of discussion of vaccines by pharmacists and  
27  
28 453 physicians with their patients and providing high quality vaccination advice may further contribute to  
29  
30 454 increased immunization rates.  
31  
32  
33  
34

## 35 455 **ACKNOWLEDGEMENTS**

36  
37  
38  
39 456 We recognize the project's overall financial support from the Swiss National Science Foundation's  
40  
41 457 National Research Programme 74 (Grant 167398) and supplementary postdoctoral fellowship  
42  
43 458 funding from the Nora van Meeuwen-Haefliger-Foundation.  
44  
45

## 46 459 **AUTHOR CONTRIBUTIONS**

47  
48  
49  
50  
51 460 **MJ** coordinated qualitative data collection and evaluation and drafted the manuscript. **JT** and **MA**  
52  
53 461 participated regularly in study advisory board meetings and provided regular inputs about the  
54  
55 462 qualitative results. **MJD** took a lead role in establishing the study's qualitative methodologies and  
56  
57 463 provided regular study supervision, inputs about the qualitative results and valuable feedbacks  
58  
59 464 during the manuscripts writing. **PET** is the principal investigator, directed the funding request and  
60

1  
2  
3 465 supervised the conduct of the study. He provided infectious disease and general medical expertise,  
4  
5 466 and oversaw study conception, design, data collection, analysis and interpretation.  
6  
7

8  
9 467 All authors read, contributed to and approved the final manuscript.  
10

## 11 12 468 **FUNDING SOURCE**

13  
14  
15  
16 469 This work was supported by the National Research Program NRP 74, grant number SNF 167398,  
17  
18 470 Switzerland.  
19

## 20 21 471 **COMPETING INTERESTS**

22  
23  
24  
25 472 None declared.  
26

## 27 28 473 **PATIENT AND PUBLIC INVOLVEMENT STATEMENT**

29  
30  
31  
32 474 No patient involved.  
33

## 34 35 475 **DATA AVAILABILITY STATEMENT**

36  
37  
38  
39 476 Data are available upon reasonable request.  
40

## 41 42 477 **ETHICS STATEMENT**

43  
44  
45 478 The study was approved by the local ethics committee, Ethikkommission Nordwest- und  
46  
47 479 Zentralschweiz (EKNZ), project-ID: 2017-00725  
48

## 49 50 480 **ORCID**

51  
52  
53  
54 481 Meliha Jusufoska: <https://orcid.org/0000-0002-6807-1900>  
55

56  
57 482  
58  
59  
60



## 483 REFERENCES

- 484 1. Federal Office of Public Health. *French version: Couverture vaccinale des enfants âgés de 2,*  
485 *8 et 16 ans en Suisse, 2014–2016.* 2018 [cited 2020 May 9]; Available from:  
486 [https://www.bag.admin.ch/dam/bag/fr/dokumente/mt/i-und-b/durchimpfung/bu-24-18-](https://www.bag.admin.ch/dam/bag/fr/dokumente/mt/i-und-b/durchimpfung/bu-24-18-durchimpfung-2014-2016-de.pdf.download.pdf/bu-24-18-durchimpfung-2014-2016-fr.pdf)  
487 [durchimpfung-2014-2016-de.pdf.download.pdf/bu-24-18-durchimpfung-2014-2016-fr.pdf](https://www.bag.admin.ch/dam/bag/fr/dokumente/mt/i-und-b/durchimpfung/bu-24-18-durchimpfung-2014-2016-de.pdf.download.pdf/bu-24-18-durchimpfung-2014-2016-fr.pdf).
- 488 2. Federal Office of Public Health. *German version: Bericht zur Grippesaison 2018/19.* 2019  
489 [cited 2020 May 9]; Available from:  
490 [https://www.bag.admin.ch/dam/bag/de/dokumente/mt/infektionskrankheiten/grippe/saisonberic](https://www.bag.admin.ch/dam/bag/de/dokumente/mt/infektionskrankheiten/grippe/saisonbericht-grippe-2018-19.pdf.download.pdf/saisonbericht-grippe-2018-19-de.pdf)  
491 [ht-grippe-2018-19.pdf.download.pdf/saisonbericht-grippe-2018-19-de.pdf](https://www.bag.admin.ch/dam/bag/de/dokumente/mt/infektionskrankheiten/grippe/saisonbericht-grippe-2018-19.pdf.download.pdf/saisonbericht-grippe-2018-19-de.pdf).
- 492 3. Tarr, P.E., M.J. Deml, and B.M. Huber, *Measles in Switzerland – progress made, but*  
493 *communication challenges lie ahead.* Swiss Med Wkly. 2019;149:w20105.
- 494 4. Federal Office of Public Health. *National Vaccination Strategy - Short Version 2017* [cited  
495 2020 May 5]; Available from: [https://www.bag.admin.ch/dam/bag/en/dokumente/mt/i-und-](https://www.bag.admin.ch/dam/bag/en/dokumente/mt/i-und-i/national-vaccination-strategy-short-version.pdf.download.pdf/national-vaccination-strategy-short-version.pdf)  
496 [i/national-vaccination-strategy-short-version.pdf.download.pdf/national-vaccination-strategy-](https://www.bag.admin.ch/dam/bag/en/dokumente/mt/i-und-i/national-vaccination-strategy-short-version.pdf.download.pdf/national-vaccination-strategy-short-version.pdf)  
497 [short-version.pdf](https://www.bag.admin.ch/dam/bag/en/dokumente/mt/i-und-i/national-vaccination-strategy-short-version.pdf.download.pdf/national-vaccination-strategy-short-version.pdf).
- 498 5. Kamal, K., S. Madhavan, and M. Amonkar, *Determinants of Adult Influenza and Pneumonia*  
499 *Immunization Rates.* Journal of the American Pharmacists Association, 2003. **43**(3): p. 403-  
500 411.
- 501 6. Deml, M.J., et al., *Determinants of vaccine hesitancy in Switzerland: study protocol of a*  
502 *mixed-methods national research programme.* BMJ Open, 2019. **9**(11): p. e032218.
- 503 7. Deml, M.J., et al., *"We treat humans, not herds!": A qualitative study of complementary and*  
504 *alternative medicine (CAM) providers' individualized approaches to vaccination in Switzerland.*  
505 Soc Sci Med, 2019. **240**: p. 112556.
- 506 8. Federal Office of Public Health. *French version: Stratégie nationale de vaccination 2017* [cited  
507 2020 October 14]; Available from: [https://www.bag.admin.ch/dam/bag/fr/dokumente/mt/i-und-](https://www.bag.admin.ch/dam/bag/fr/dokumente/mt/i-und-i/insi-nsi-strategie-vollversion.pdf.download.pdf/insi-strategie-vollversion-fr.pdf)  
508 [i/insi-nsi-strategie-vollversion.pdf.download.pdf/insi-strategie-vollversion-fr.pdf](https://www.bag.admin.ch/dam/bag/fr/dokumente/mt/i-und-i/insi-nsi-strategie-vollversion.pdf.download.pdf/insi-strategie-vollversion-fr.pdf).
- 509 9. Vlahov, D., et al., *Strategies for Improving Influenza Immunization Rates among Hard-to-*  
510 *Reach Populations.* Journal of Urban Health, 2007. **84**(4): p. 615-631.
- 511 10. Hogue, M.D., et al., *Pharmacist Involvement with Immunizations: A Decade of Professional*  
512 *Advancement.* Journal of the American Pharmacists Association, 2006. **46**(2): p. 168-182.

- 1  
2  
3 513 11. Goad, J.A., et al., *Vaccinations Administered During Off-Clinic Hours at a National Community*  
4 514 *Pharmacy: Implications for Increasing Patient Access and Convenience*. The Annals of Family  
5 515 Medicine, 2013. **11**(5): p. 429-436.  
6  
7  
8 516 12. Klepser, M.E., *Seasonal and pandemic influenza: Preparing pharmacists for the frontline*.  
9 517 Journal of the American Pharmacists Association, 2008. **48**(2): p. 312-314.  
10  
11  
12 518 13. Grabenstein, J., *Pharmacists as vaccine advocates: roles in community pharmacies, nursing*  
13 519 *homes, and hospitals*. Vaccine, 1998. **16**(18): p. 1705-1710.  
14  
15  
16 520 14. Valeri, F., et al., *Immunisation coverage of adults: a vaccination counselling campaign in the*  
17 521 *pharmacies in Switzerland*. Swiss Med Wkly. 2014;144:w13955.  
18  
19  
20 522 15. International Pharmaceutical Federation (FIP), *An overview of current pharmacy impact on*  
21 523 *immunisation: a global report 2016*. The Hague: International Pharmaceutical Federation,  
22 524 2016.  
23  
24  
25 525 16. Leuthold, C., O. Bugnon, and J. Berger, *The Role of Community Pharmacists in Travel Health*  
26 526 *and Vaccination in Switzerland*. Pharmacy (Basel), 2018. **6**(4).  
27  
28  
29 527 17. Isenor, J.E., et al., *Impact of pharmacists as immunizers on vaccination rates: A systematic*  
30 528 *review and meta-analysis*. Vaccine, 2016. **34**(47): p. 5708-5723.  
31  
32  
33 529 18. Federal Office of Public Health. *French version: Loi fédérale sur les professions médicales*  
34 530 *universitaires (SR 811.11, Loi sur les professions médicales, LPMéd), Art. 9*. 2006 [cited  
35 531 2020 May 8]; Available from: [https://www.admin.ch/opc/fr/classified-  
37 533 compilation/20040265/index.html](https://www.admin.ch/opc/fr/classified-<br/>36 532 compilation/20040265/index.html).  
38  
39  
40 533 19. Federal Office of Public Health. *French version: Place des pharmacies dans les soins de*  
41 534 *base. Rapport du Conseil fédéral élaboré en réponse au postulat Humbel (12.3864) du 27*  
42 535 *septembre 2012*. 2016 [cited 2020 May 8]; Available from:  
43 536 [https://www.bag.admin.ch/dam/bag/fr/dokumente/nat-  
46 539 gesundheitspolitik/koordinierte\\_versorgung/verstaerkung\\_bestehender\\_aktivitaeten/po\\_12.38  
47 540 64\\_bericht.pdf.download.pdf/po\\_12.3864\\_bericht\\_f\\_def.pdf](https://www.bag.admin.ch/dam/bag/fr/dokumente/nat-<br/>44 537 gesundheitspolitik/koordinierte_versorgung/verstaerkung_bestehender_aktivitaeten/po_12.38<br/>45 538 64_bericht.pdf.download.pdf/po_12.3864_bericht_f_def.pdf).  
48  
49  
50 539 20. The Federal Assembly-The Swiss Parliament. *French version: 12.3864 Postulat, Place des*  
51 540 *pharmacies dans les soins de base*. 2012 [cited 2020 May 9]; Available from:  
52 541 <https://www.parlament.ch/en/ratsbetrieb/suche-curia-vista/geschaefft?AffairId=20123864>.  
53  
54  
55  
56  
57  
58  
59  
60

- 1  
2  
3 542 21. Swiss Pharmacists Association. *German version: Liste der Impfungen nach Kanton, Stand*  
4  
5 543 *Februar 2020* 2020 [cited 2020 May 27]; Available from:  
6  
7 544 <https://impfapotheke.ch/assets/impfapotheken/liste-der-impfungen-nach-kanton-200225->  
8  
9 545 [de.pdf](https://impfapotheke.ch/assets/impfapotheken/liste-der-impfungen-nach-kanton-200225-de.pdf).
- 10 546 22. Foederatio Pharmaceutica Helvetiae. *German version: Fähigkeitsprogramm FPH Impfen und*  
11  
12 547 *Blutentnahme*. 2014/2015 [cited 2020 May 6]; Available from:  
13  
14 548 [https://www.pharmasuisse.org/data/docs/de/23096/F%C3%A4higkeitsprogramm-FPH-Impfen-](https://www.pharmasuisse.org/data/docs/de/23096/F%C3%A4higkeitsprogramm-FPH-Impfen-und-Blutentnahme.pdf?v=1.0)  
15  
16 549 [und-Blutentnahme.pdf?v=1.0](https://www.pharmasuisse.org/data/docs/de/23096/F%C3%A4higkeitsprogramm-FPH-Impfen-und-Blutentnahme.pdf?v=1.0).
- 17  
18 550 23. Federal Office of Public Health. *French version 1: Objectifs de formation en pharmacie selon*  
19  
20 551 *la LPMéd*. 2008 [cited 2020 May 8]; Available from:  
21  
22 552 <https://www.bag.admin.ch/dam/bag/fr/dokumente/berufe->  
23  
24 553 [gesundheitswesen/medizinalberufe/eidg-pruefungen-universitaerer-](https://www.bag.admin.ch/dam/bag/fr/dokumente/berufe-gesundheitswesen/medizinalberufe/eidg-pruefungen-universitaerer-)  
25  
26 554 [medizinalberufe/pharmazie/lernzielkatalog-pharmazie-version-](https://www.bag.admin.ch/dam/bag/fr/dokumente/berufe-gesundheitswesen/medizinalberufe/pharmazie/lernzielkatalog-pharmazie-version-1.pdf.download.pdf/lernzielkatalog-pharmazie.pdf)  
27  
28 555 [1.pdf.download.pdf/lernzielkatalog-pharmazie.pdf](https://www.bag.admin.ch/dam/bag/fr/dokumente/berufe-gesundheitswesen/medizinalberufe/pharmazie/lernzielkatalog-pharmazie-version-1.pdf.download.pdf/lernzielkatalog-pharmazie.pdf).
- 29  
30 556 24. Sottas, B., Kissmann, S. *German version: Ist-Analyse Aus-, Weiter- und Fortbildung im*  
31  
32 557 *Impfbereich. Schlussbericht*. BAG. 2019 [cited 2020 May 8]; Available from:  
33  
34 558 <https://www.bag.admin.ch/dam/bag/de/dokumente/mt/i-und-i/insi/bildung-impfen->  
35  
36 559 [gesundheitsberufe.pdf.download.pdf/bildung-impfen-gesundheitsberufe-de.pdf](https://www.bag.admin.ch/dam/bag/de/dokumente/mt/i-und-i/insi/bildung-impfen-gesundheitsberufe.pdf.download.pdf/bildung-impfen-gesundheitsberufe-de.pdf).
- 37  
38 560 25. Bradley, F., D.M. Ashcroft, and N. Crossley, *Negotiating inter-professional interaction: playing*  
39  
40 561 *the general practitioner-pharmacist game*. *Sociology of Health & Illness*, 2018. **40**(3): p. 426-  
41  
42 562 444.
- 43  
44 563 26. Cunningham, D.E., et al., *GP and pharmacist inter-professional learning – a grounded theory*  
45  
46 564 *study*. *Education for Primary Care*, 2016. **27**(3): p. 188-195.
- 47  
48 565 27. Federal Office of Public Health. *Support programme «Interprofessionality in healthcare»*.  
49  
50 566 2017-2020 20.12.2020 [cited 2020 May 7]; Available from:  
51  
52 567 <https://www.bag.admin.ch/bag/en/home/strategie-und-politik/nationale->  
53  
54 568 [gesundheitspolitik/foerderprogramme-der-fachkraefteinitiative-plus/foerderprogramme-](https://www.bag.admin.ch/bag/en/home/strategie-und-politik/nationale-gesundheitspolitik/foerderprogramme-der-fachkraefteinitiative-plus/foerderprogramme-)  
55  
56 569 [interprofessionalitaet.html#-1903361658](https://www.bag.admin.ch/bag/en/home/strategie-und-politik/nationale-gesundheitspolitik/foerderprogramme-der-fachkraefteinitiative-plus/foerderprogramme-interprofessionalitaet.html#-1903361658).

- 1  
2  
3 570 28. Moore, T., J. Kennedy, and S. McCarthy, *Exploring the General Practitioner-pharmacist*  
4 *relationship in the community setting in Ireland*. International Journal of Pharmacy Practice,  
5 571  
6 2014. **22**(5): p. 327-334.  
7 572
- 8  
9 573 29. Brügger, F.A., et al., *German Version: Interdisziplinäre Zusammenarbeit zwischen*  
10 *Apotheker/innen und anderen universitären Medizinalpersonen und/oder*  
11 574  
12 *Gesundheitsfachpersonen*. Büro für Arbeits- und Sozialpolitische Studien BASS AG, 2014.  
13 575
- 14 576 30. Swiss Pharmacists Association. *French version: Faits et chiffres Pharmacies suisses 2020*.  
15 577  
16 2020 [cited 2020 May 10]; Available from:  
17 578  
18 <https://www.pharmasuisse.org/data/docs/de/20910/Faits-et-chiffres-2020.pdf?v=1.1>.  
19 579
- 20 579 31. National Research Programme. *28 Vaccine-sceptical patients and doctors in Switzerland*  
21 2020 [cited 2020 October 25]; Available from: [http://www.nfp74.ch/en/projects/out-patient-](http://www.nfp74.ch/en/projects/out-patient-care/project-tarr)  
22 580  
23 [care/project-tarr](http://www.nfp74.ch/en/projects/out-patient-care/project-tarr).  
24 581
- 25 582 32. Deml, M.J., et al., *'Problem patients and physicians' failures': What it means for doctors to*  
26 583  
27 *counsel vaccine hesitant patients in Switzerland*. Soc Sci Med, 2020. **255**: p. 112946.  
28 584
- 29 584 33. Braun, V. and V. Clarke, *Using thematic analysis in psychology*. Qualitative Research in  
30 585  
31 Psychology, 2006. **3**(2): p. 77-101.  
32 586
- 33 586 34. Gale, N.K., et al., *Using the framework method for the analysis of qualitative data in multi-*  
34 587  
35 *disciplinary health research*. BMC Med Res Methodol, 2013. **13**: p. 117.  
36 588
- 37 588 35. Tong, A., P. Sainsbury, and J. Craig, *Consolidated criteria for reporting qualitative research*  
38 589  
39 *(COREQ): a 32-item checklist for interviews and focus groups*. International Journal for  
40 590  
41 Quality in Health Care, 2007. **19**(6): p. 349–57.  
42 591
- 43 591 36. Bartsch, S.M., et al., *Epidemiologic and economic impact of pharmacies as vaccination*  
44 592  
45 *locations during an influenza epidemic*. Vaccine, 2018. **36**(46): p. 7054-7063.  
46 593
- 47 593 37. Ernst, M.E., G.R. Bergus, and B.A. Sorofman, *Research: Patients' Acceptance of Traditional*  
48 594  
49 *and Nontraditional Immunization Providers*. Journal of the American Pharmaceutical  
50 595  
51 Association (1996), 2001. **41**(1): p. 53-59.  
52 596
- 53 596 38. Harding, G. and K. Taylor, *Pharmacy's strength lies in its blend of clinical, scientific and social*  
54 597  
55 *skills*. The Pharmaceutical Journal, 2004. **273**: p. 126.  
56 598
- 57 598 39. Valiquette, J.R. and P. Bedard, *Community pharmacists' knowledge, beliefs and attitudes*  
58 599  
59 *towards immunization in Quebec*. Can J Public Health, 2015. **106**(3): p. e89-94.  
60

- 1  
2  
3 600 40. Schaffer, S.J., et al., *How Effectively Can Health Care Settings Beyond the Traditional*  
4  
5 601 *Medical Home Provide Vaccines to Adolescents?* Pediatrics, 2008. **121**(Supplement 1): p.  
6  
7 602 S35-S45.
- 8  
9 603 41. David N. J., *Selling Drugs in the Physician's Office A Problem of Medical Ethics*. Philosophy  
10  
11 604 Documentation Center, 1992. **Vol. 11**: p. pp. 73-88.
- 12  
13 605 42. Interpharma mit Datengrundlage Quintiles Transnational Corp (IQVIA) Schweiz. *German*  
14  
15 606 *version: Pharma-Markt Schweiz 2019* [cited 2020 May 11]; Available from:  
16  
17 607 [https://www.interpharma.ch/wp-content/uploads/2020/02/ly\\_iph.01.19.002\\_-](https://www.interpharma.ch/wp-content/uploads/2020/02/ly_iph.01.19.002_-_pharmamarkt_schweiz_2019_d_web-komprimiert.pdf)  
18  
19 608 [\\_pharmamarkt\\_schweiz\\_2019\\_d\\_web-komprimiert.pdf](https://www.interpharma.ch/wp-content/uploads/2020/02/ly_iph.01.19.002_-_pharmamarkt_schweiz_2019_d_web-komprimiert.pdf).
- 20  
21 609 43. Westrick, S.C., et al., *National survey of pharmacy-based immunization services*. Vaccine,  
22  
23 610 2018. **36**(37): p. 5657-5664.
- 24  
25 611 44. Rothholz, M.C., *Pharmacist-provided immunization compensation and recognition: White*  
26  
27 612 *paper summarizing APhA/AMCP stakeholder meeting*. Journal of the American Pharmacists  
28  
29 613 Association, 2011. **51**(6): p. 704-712.
- 30  
31 614 45. Rollnick, S., et al., *Motivational interviewing*. BMJ, 2010. **340**(apr27 2): p. c1900-c1900.
- 32  
33 615 46. Brackett, A., M. Butler, and L. Chapman, *Using motivational interviewing in the community*  
34  
35 616 *pharmacy to increase adult immunization readiness: A pilot evaluation*. Journal of the  
36  
37 617 American Pharmacists Association, 2015. **55**(2): p. 182-186.
- 38  
39 618 47. Gagneur, A., V. Gosselin, and È. Dubé, *Motivational interviewing: A promising tool to address*  
40  
41 619 *vaccine hesitancy*. Vaccine, 2018. **36**(44): p. 6553-6555.
- 42  
43 620 48. Gagneur, A., et al., *A postpartum vaccination promotion intervention using motivational*  
44  
45 621 *interviewing techniques improves short-term vaccine coverage: PromoVac study*. BMC Public  
46  
47 622 Health, 2018. **18**(1).
- 48  
49 623 49. Grimm P. *Social Desirability Bias*. Wiley Online Library 2010 [cited 2020 December, 12];  
50  
51 624 Available from: <https://onlinelibrary.wiley.com/doi/abs/10.1002/9781444316568.wiem02057>.

625

626 **Supplemental material- online only**

627

Supplementary Table 1: List of vaccinations authorized in Swiss pharmacies according to cantons

| Canton | Approval since (extensions) | Vaccination in pharmacies | Age [Years] | Influenza | FSME | Hep. A | Hep. B | Hep. A+B | MMR | Other (HPV, dT <sub>a</sub> , etc)                                                        |
|--------|-----------------------------|---------------------------|-------------|-----------|------|--------|--------|----------|-----|-------------------------------------------------------------------------------------------|
| AG     | -                           | -                         |             |           |      |        |        |          |     |                                                                                           |
| AI     | -                           |                           |             |           |      |        |        |          |     |                                                                                           |
| AR     | -                           | -                         |             |           |      |        |        |          |     |                                                                                           |
| BE     | 2015 (2018)                 | +                         | 16          | +         | +    | +*     | +*     | +*       |     |                                                                                           |
| BL     | 2016 (2017, 2019.07)        | +                         | 16          | +         | +    | +      | +      | +        | +   | +<br>all according to CH guidelines                                                       |
| BS     | 2018                        | +                         | 18          | +         | +    | +      | +      | +        |     |                                                                                           |
| FR     | 2015 (2018)                 | +                         | 16          | +         | +    |        |        |          | +   | Tetanus (dT, dTp)                                                                         |
| GE     | 2016 (2018.12)              | +                         | 16          | +         |      |        |        |          |     |                                                                                           |
| GL     | 2020.02                     | +                         | 16          | +         | +    | +*     | +*     | +*       |     |                                                                                           |
| GR     | 2016 (02.2020)              | +                         | 16          | +         | +    | +*     | +*     | +*       | +*  | +*<br>all according to CH guidelines                                                      |
| JU     | 2016 (2019.03)              | +                         | 16          | +         | +    | +      | +      | +        |     |                                                                                           |
| LU     | 2017                        | +                         | 16          | +         | +    | +*     | +*     | +*       | +*  | +*<br>all according to CH guidelines                                                      |
| NE     | 2015                        | +                         | 16          | +         | +    |        |        |          | +*  |                                                                                           |
| NW     | 2017                        | +                         | 16          | +         | +    | +*     | +*     | +*       |     |                                                                                           |
| OW     | 2019                        | +                         | 16          | +         | +    | +*     | +*     | +*       |     |                                                                                           |
| SG     | 2016                        | +                         | 16          | +         | +    |        |        |          |     |                                                                                           |
| SH     | 2016                        | +                         | 16          | +         | +    | +*     | +*     | +*       |     |                                                                                           |
| SO     | 2015                        | +                         | 16          | +         | +    | +      | +      | +        | +   | +<br>all according to CH guidelines                                                       |
| SZ     | 2016                        | +                         | 16          | +         | +    | +*     | +*     | +*       |     |                                                                                           |
| TI     |                             | R**                       |             |           |      |        |        |          |     |                                                                                           |
| TG     | 2016                        | +                         | 16          | +         | +    | +*     | +*     | +*       | +*  | +*<br>all according to CH guidelines                                                      |
| UR     | 2019.05                     | +                         | > 16        | +         | +    | +*     | +*     | +*       |     |                                                                                           |
| VD     | 2016 (2017)                 | +                         | 16          | +         | +    | +*     | +*     | +*       | +   |                                                                                           |
| VS     | 2016 (08.2019; 02.2020)     | +                         | 16          | +         | +    |        |        |          |     | further vaccinations within the framework of campaigns (time-limited, cantonally defined) |
| ZG     | 2017                        | +                         | 16          | +         | +    | +*     | +*     | +*       |     |                                                                                           |
| ZH     | 2015                        | +                         | 16          | +         | +    | +*     | +*     | +*       |     |                                                                                           |

\*from 2nd dose, after initial vaccination by physician has taken place

\*\*R: Vaccination by prescription

Table as of: 02/25/2020

## COREQ (COnsolidated criteria for REporting Qualitative research) Checklist

A checklist of items that should be included in reports of qualitative research. You must report the page number in your manuscript where you consider each of the items listed in this checklist. If you have not included this information, either revise your manuscript accordingly before submitting or note N/A.

| Topic                                          | Item No. | Guide Questions/Description                                                                                                                              | Reported on Page No. |
|------------------------------------------------|----------|----------------------------------------------------------------------------------------------------------------------------------------------------------|----------------------|
| <b>Domain 1: Research team and reflexivity</b> |          |                                                                                                                                                          |                      |
| <i>Personal characteristics</i>                |          |                                                                                                                                                          |                      |
| Interviewer/facilitator                        | 1        | Which author/s conducted the interview or focus group?                                                                                                   |                      |
| Credentials                                    | 2        | What were the researcher's credentials? E.g. PhD, MD                                                                                                     |                      |
| Occupation                                     | 3        | What was their occupation at the time of the study?                                                                                                      |                      |
| Gender                                         | 4        | Was the researcher male or female?                                                                                                                       |                      |
| Experience and training                        | 5        | What experience or training did the researcher have?                                                                                                     |                      |
| <i>Relationship with participants</i>          |          |                                                                                                                                                          |                      |
| Relationship established                       | 6        | Was a relationship established prior to study commencement?                                                                                              |                      |
| Participant knowledge of the interviewer       | 7        | What did the participants know about the researcher? e.g. personal goals, reasons for doing the research                                                 |                      |
| Interviewer characteristics                    | 8        | What characteristics were reported about the interviewer/facilitator? e.g. Bias, assumptions, reasons and interests in the research topic                |                      |
| <b>Domain 2: Study design</b>                  |          |                                                                                                                                                          |                      |
| <i>Theoretical framework</i>                   |          |                                                                                                                                                          |                      |
| Methodological orientation and Theory          | 9        | What methodological orientation was stated to underpin the study? e.g. grounded theory, discourse analysis, ethnography, phenomenology, content analysis |                      |
| <i>Participant selection</i>                   |          |                                                                                                                                                          |                      |
| Sampling                                       | 10       | How were participants selected? e.g. purposive, convenience, consecutive, snowball                                                                       |                      |
| Method of approach                             | 11       | How were participants approached? e.g. face-to-face, telephone, mail, email                                                                              |                      |
| Sample size                                    | 12       | How many participants were in the study?                                                                                                                 |                      |
| Non-participation                              | 13       | How many people refused to participate or dropped out? Reasons?                                                                                          |                      |
| <i>Setting</i>                                 |          |                                                                                                                                                          |                      |
| Setting of data collection                     | 14       | Where was the data collected? e.g. home, clinic, workplace                                                                                               |                      |
| Presence of non-participants                   | 15       | Was anyone else present besides the participants and researchers?                                                                                        |                      |
| Description of sample                          | 16       | What are the important characteristics of the sample? e.g. demographic data, date                                                                        |                      |
| <i>Data collection</i>                         |          |                                                                                                                                                          |                      |
| Interview guide                                | 17       | Were questions, prompts, guides provided by the authors? Was it pilot tested?                                                                            |                      |
| Repeat interviews                              | 18       | Were repeat interviews carried out? If yes, how many?                                                                                                    |                      |
| Audio/visual recording                         | 19       | Did the research use audio or visual recording to collect the data?                                                                                      |                      |
| Field notes                                    | 20       | Were field notes made during and/or after the interview or focus group?                                                                                  |                      |
| Duration                                       | 21       | What was the duration of the interviews or focus group?                                                                                                  |                      |
| Data saturation                                | 22       | Was data saturation discussed?                                                                                                                           |                      |
| Transcripts returned                           | 23       | Were transcripts returned to participants for comment and/or                                                                                             |                      |

| Topic                                  | Item No. | Guide Questions/Description                                                                                                        | Reported on Page No. |
|----------------------------------------|----------|------------------------------------------------------------------------------------------------------------------------------------|----------------------|
|                                        |          | correction?                                                                                                                        |                      |
| <b>Domain 3: analysis and findings</b> |          |                                                                                                                                    |                      |
| <i>Data analysis</i>                   |          |                                                                                                                                    |                      |
| Number of data coders                  | 24       | How many data coders coded the data?                                                                                               |                      |
| Description of the coding tree         | 25       | Did authors provide a description of the coding tree?                                                                              |                      |
| Derivation of themes                   | 26       | Were themes identified in advance or derived from the data?                                                                        |                      |
| Software                               | 27       | What software, if applicable, was used to manage the data?                                                                         |                      |
| Participant checking                   | 28       | Did participants provide feedback on the findings?                                                                                 |                      |
| <i>Reporting</i>                       |          |                                                                                                                                    |                      |
| Quotations presented                   | 29       | Were participant quotations presented to illustrate the themes/findings?<br>Was each quotation identified? e.g. participant number |                      |
| Data and findings consistent           | 30       | Was there consistency between the data presented and the findings?                                                                 |                      |
| Clarity of major themes                | 31       | Were major themes clearly presented in the findings?                                                                               |                      |
| Clarity of minor themes                | 32       | Is there a description of diverse cases or discussion of minor themes?                                                             |                      |

Developed from: Tong A, Sainsbury P, Craig J. Consolidated criteria for reporting qualitative research (COREQ): a 32-item checklist for interviews and focus groups. *International Journal for Quality in Health Care*. 2007. Volume 19, Number 6: pp. 349 – 357

**Once you have completed this checklist, please save a copy and upload it as part of your submission. DO NOT include this checklist as part of the main manuscript document. It must be uploaded as a separate file.**



# BMJ Open

## “Vaccination needs to be easy for the people, right ?”: A Qualitative Study of the Roles of Physicians and Pharmacists Regarding Vaccination in Switzerland

|                                 |                                                                                                                                                                                                                                                                                                                                                                                                                                                                                                                                                                                                                                                                                                                                                                                                                                                                                                                                                                                                                                                                                                                             |
|---------------------------------|-----------------------------------------------------------------------------------------------------------------------------------------------------------------------------------------------------------------------------------------------------------------------------------------------------------------------------------------------------------------------------------------------------------------------------------------------------------------------------------------------------------------------------------------------------------------------------------------------------------------------------------------------------------------------------------------------------------------------------------------------------------------------------------------------------------------------------------------------------------------------------------------------------------------------------------------------------------------------------------------------------------------------------------------------------------------------------------------------------------------------------|
| Journal:                        | <i>BMJ Open</i>                                                                                                                                                                                                                                                                                                                                                                                                                                                                                                                                                                                                                                                                                                                                                                                                                                                                                                                                                                                                                                                                                                             |
| Manuscript ID                   | bmjopen-2021-053163.R1                                                                                                                                                                                                                                                                                                                                                                                                                                                                                                                                                                                                                                                                                                                                                                                                                                                                                                                                                                                                                                                                                                      |
| Article Type:                   | Original research                                                                                                                                                                                                                                                                                                                                                                                                                                                                                                                                                                                                                                                                                                                                                                                                                                                                                                                                                                                                                                                                                                           |
| Date Submitted by the Author:   | 17-Oct-2021                                                                                                                                                                                                                                                                                                                                                                                                                                                                                                                                                                                                                                                                                                                                                                                                                                                                                                                                                                                                                                                                                                                 |
| Complete List of Authors:       | Jusufoska, Meliha; University of Basel, University Department of Pharmaceutical Sciences; Kantonsspital Baselland Medizinische Universitätsklinik Standort Bruderholz, University Department of Medicine and Infectious Diseases Service<br>Abreu de Azevedo, Marta; University of Basel, University Department of Pharmaceutical Sciences; Kantonsspital Baselland Medizinische Universitätsklinik Standort Bruderholz, University Department of Medicine and Infectious Diseases Services<br>Tolic, Josipa; University of Basel, University Department of Pharmaceutical Sciences; Kantonsspital Baselland Medizinische Universitätsklinik Standort Bruderholz, University Department of Medicine and Infectious Diseases Services<br>Deml, Michael; University of Geneva, Institute of Sociological Research, Department of Sociology; University of Cape Town, School of Public Health & Family Medicine, Division of Social and Behavioural Sciences<br>Tarr, Philip ; Kantonsspital Baselland Medizinische Universitätsklinik Standort Bruderholz, University Department of Medicine and Infectious Diseases Services |
| <b>Primary Subject Heading</b>: | Qualitative research                                                                                                                                                                                                                                                                                                                                                                                                                                                                                                                                                                                                                                                                                                                                                                                                                                                                                                                                                                                                                                                                                                        |
| Secondary Subject Heading:      | Infectious diseases, Qualitative research, Public health                                                                                                                                                                                                                                                                                                                                                                                                                                                                                                                                                                                                                                                                                                                                                                                                                                                                                                                                                                                                                                                                    |
| Keywords:                       | IMMUNOLOGY, QUALITATIVE RESEARCH, EDUCATION & TRAINING (see Medical Education & Training), HEALTH SERVICES ADMINISTRATION & MANAGEMENT, Public health < INFECTIOUS DISEASES                                                                                                                                                                                                                                                                                                                                                                                                                                                                                                                                                                                                                                                                                                                                                                                                                                                                                                                                                 |
|                                 |                                                                                                                                                                                                                                                                                                                                                                                                                                                                                                                                                                                                                                                                                                                                                                                                                                                                                                                                                                                                                                                                                                                             |

SCHOLARONE™  
Manuscripts



I, the Submitting Author has the right to grant and does grant on behalf of all authors of the Work (as defined in the below author licence), an exclusive licence and/or a non-exclusive licence for contributions from authors who are: i) UK Crown employees; ii) where BMJ has agreed a CC-BY licence shall apply, and/or iii) in accordance with the terms applicable for US Federal Government officers or employees acting as part of their official duties; on a worldwide, perpetual, irrevocable, royalty-free basis to BMJ Publishing Group Ltd ("BMJ") its licensees and where the relevant Journal is co-owned by BMJ to the co-owners of the Journal, to publish the Work in this journal and any other BMJ products and to exploit all rights, as set out in our [licence](#).

The Submitting Author accepts and understands that any supply made under these terms is made by BMJ to the Submitting Author unless you are acting as an employee on behalf of your employer or a postgraduate student of an affiliated institution which is paying any applicable article publishing charge ("APC") for Open Access articles. Where the Submitting Author wishes to make the Work available on an Open Access basis (and intends to pay the relevant APC), the terms of reuse of such Open Access shall be governed by a Creative Commons licence – details of these licences and which [Creative Commons](#) licence will apply to this Work are set out in our licence referred to above.

Other than as permitted in any relevant BMJ Author's Self Archiving Policies, I confirm this Work has not been accepted for publication elsewhere, is not being considered for publication elsewhere and does not duplicate material already published. I confirm all authors consent to publication of this Work and authorise the granting of this licence.

1  
2  
3  
4 1 **“Vaccination needs to be easy for the people, right ?”: A Qualitative Study**  
5  
6  
7 2 **of the Roles of Physicians and Pharmacists Regarding Vaccination in**  
8  
9  
10 3 **Switzerland**  
11  
12

13 4 Authors: Meliha Jusufoska<sup>1,2</sup>, Marta Abreu de Azevedo<sup>1,2</sup>, Josipa Tolic<sup>1,2</sup>, Michael J. Demi<sup>3,4, \*</sup>, Philip  
14  
15 5 E. Tarr <sup>1, \*</sup>  
16

17  
18 6 **Affiliations:**  
19

20  
21 7 <sup>1</sup> University Department of Medicine and Infectious Diseases Service, Kantonsspital Baselland, University  
22  
23 8 of Basel, Bruderholz, Switzerland  
24

25  
26 9 <sup>2</sup> Pharmaceutical Care Research Group, Department of Pharmaceutical Sciences, University of Basel,  
27  
28 10 Petersplatz 14, 4001, Basel, Switzerland  
29

30  
31 11 <sup>3</sup> Institute of Sociological Research, Department of Sociology, University of Geneva; Geneva, Switzerland  
32

33  
34 12 <sup>4</sup> Division of Social and Behavioural Sciences, School of Public Health & Family Medicine, University of  
35  
36 13 Cape Town; Cape Town, South Africa  
37

38  
39 14 \* these authors contributed equally to the manuscript  
40

41  
42 15 **Corresponding author:**  
43

44  
45 16 Philip E. Tarr, MD, University Dept. of Medicine and Infectious Diseases Service, Kantonsspital Baselland,  
46  
47 17 University of Basel, 4101 Bruderholz, Switzerland; Phone +41 (61) 436 2212, Fax +41 (61) 436 3670,  
48  
49 18 [philip.tarr@unibas.ch](mailto:philip.tarr@unibas.ch)  
50

51  
52 19 **Word count:** 4634 words  
53  
54  
55  
56  
57  
58  
59  
60

## 22 ABSTRACT

23 **Objective** Vaccination in pharmacies has been a key component of national vaccination strategies to  
24 facilitate vaccination access. Qualitative data on the perspectives of professional stakeholders on  
25 vaccination in pharmacies and on the professional relations of pharmacists with physicians regarding  
26 increasing immunization rates is limited. We conducted a qualitative study in Switzerland. The main  
27 aim was to gain further insight into professional stakeholders' perspectives on vaccination counseling  
28 and administration conducted in pharmacies, and to further understand their views on physicians'  
29 and pharmacists' roles in increasing immunization rates.

30 **Design** We conducted semi-structured qualitative interviews. We coded and analyzed transcripts  
31 using thematic analysis.

32 **Setting** Face-to-face interviews took place in German- and French-speaking regions of Switzerland.

33 **Participants** We interviewed 14 key vaccination stakeholders including health authorities, heads of  
34 pharmacy management, and professional association boards. All participants had a background in  
35 medicine or pharmacy.

36 **Results** Three main themes emerged from the qualitative data: (1) Participants viewed pharmacists  
37 as competent to provide vaccination counseling and administration based on their university  
38 training; (2) inter-professional cooperation between physicians and pharmacists on vaccination  
39 topics is limited and should be improved; and (3) pharmacists play an important role in increasing  
40 immunization rates by facilitating vaccination access and through provision of vaccination  
41 counseling.

42 **Conclusion** By providing vaccination counseling and administering vaccines, pharmacists play an  
43 important public health role. Healthcare policies and health authorities should encourage more

1  
2  
3 44 involvement of pharmacists and encourage inter-professional cooperation between physicians and  
4  
5 45 pharmacists in order to improve vaccination counseling and increase immunization rates.  
6  
7

8  
9 46 **Keywords:** Vaccination, Immunization Rates, Pharmacist, Physician, Stakeholder, Inter-  
10  
11 47 professionalism  
12  
13

## 14 48 **STRENGTHS AND LIMITATIONS OF THIS STUDY**

- 15  
16  
17  
18 49 1. The qualitative study design provides novel insights into the opinions of key Swiss experts  
19  
20 50 with both medical and pharmacy backgrounds and allows us to gain a deeper understanding  
21  
22 51 of the topic of vaccination in pharmacies from the participants' own perspectives.  
23  
24  
25 52  
26  
27 53 2. This study includes detailed insights into the views of a wide variety of key actors, by  
28  
29 54 including stakeholders from German- and French-language regions of Switzerland, from  
30  
31 55 public health, professional pharmacists and physicians organisations, and complementary  
32  
33 56 medicine and biomedicine.  
34  
35  
36 57  
37  
38 58 3. The methodological approach to recruit only key Swiss experts on vaccination topics limits  
39  
40 59 our results, because practicing physicians and pharmacists are under-represented in our  
41  
42 60 study.  
43  
44  
45 61  
46  
47 62 4. Our results reflect the opinions of a limited number of experts and should be generalized  
48  
49 63 with caution.  
50  
51  
52 64

## 65 INTRODUCTION

66 Despite generally high vaccination rates, vaccination coverage in many Western countries is not  
67 currently meeting public health targets to protect their populations against measles, human  
68 papillomavirus (HPV), and influenza [1-4]. Insufficient immunization rates are not always simply a  
69 result of negative attitudes towards vaccination, a lack of reliable information, or vaccine hesitancy  
70 (VH); they can also result from inadequate access to vaccination services [5-9]. For example, hard-to-  
71 reach populations, such as healthy adolescents with no primary care physician, are often missed by  
72 healthcare systems [10]. Pharmacists have been involved in vaccination for many years [11], and  
73 pharmacists involvement has been linked to increased vaccination rates, for example in the United  
74 States [12, 13], Canada [14] and in the UK [15]. With their extended business hours and walk-in  
75 services, pharmacies offer easy access to health care providers and immunization delivery [13, 16]. In  
76 recent years, pharmacists in certain Western countries have become involved in offering vaccination  
77 services by serving as vaccination advocates, facilitators, and immunizers [6, 17-21].

78 Vaccination in pharmacies can increase access to immunizations and improve vaccination counseling  
79 [14, 20]. For these reasons, pharmacists have been allowed and are encouraged to administer certain  
80 vaccines as a key component of the 2015 Swiss National Vaccination Strategy [5, 9]. Additionally,  
81 pharmacists are now increasingly expected to provide preventive health services, having been  
82 attributed this role in the Swiss national law of medical professions [22-24]. In 22 of the 26 Swiss  
83 cantons (states), community pharmacists can currently administer vaccines (Table 1) [25]. This  
84 requires (since 2011) them to have obtained specific pre- and post-graduate training, an appropriate  
85 federal certificate [26], and there is a compulsory continuing education requirement [20, 22, 27, 28].

86 Cooperation between physicians and pharmacists has the potential to facilitate access to vaccination  
87 and other health services and to improve the quality of the care delivered [29-32]. However,  
88 vaccination counseling and administration in pharmacies has previously been met with resistance by  
89 physicians in the US and other countries [17, 33], with physicians expressing doubts that pharmacists

90 are qualified to deal with acute adverse reactions to vaccines, such as anaphylactic reactions. This  
 91 resistance was also related to fears of reduced physician revenue when patients obtain vaccination in  
 92 pharmacies rather than physicians' offices [32]. Conversely, pharmacists have been critical of  
 93 physicians being allowed to sell medication directly to the patient in their offices (a practice referred  
 94 to in Switzerland as "self-dispensation" of medication by physicians) in countries including the UK  
 95 [34, 35] and Switzerland [36, 37], thereby reducing revenue from drug sales in pharmacies.

96 *Table 1: List of vaccinations authorized in pharmacies in Switzerland by canton*

| Canton | Approval since (extensions) | Vaccination in pharmacies | Age [Years] | Influenza | FSME | Hep. A | Hep. B | Hep. A+B | MMR | Other (HPV, dT, etc)                                                                      |
|--------|-----------------------------|---------------------------|-------------|-----------|------|--------|--------|----------|-----|-------------------------------------------------------------------------------------------|
| AG     | -                           | -                         |             |           |      |        |        |          |     |                                                                                           |
| AI     | -                           |                           |             |           |      |        |        |          |     |                                                                                           |
| AR     | -                           | -                         |             |           |      |        |        |          |     |                                                                                           |
| BE     | 2015 (2018)                 | +                         | 16          | +         | +    | +      | +      | +        |     |                                                                                           |
| BL     | 2016 (2017,2019.07)         | +                         | 16          | +         | +    | +      | +      | +        | +   | +<br>all according to CH guidelines                                                       |
| BS     | 2018                        | +                         | 18          | +         | +    | +      | +      | +        |     |                                                                                           |
| FR     | 2015 (2018)                 | +                         | 16          | +         | +    |        |        |          | +   | Tetanus (dT, dTp)                                                                         |
| GE     | 2016(2018.12)               | +                         | 16          | +         |      |        |        |          |     |                                                                                           |
| GL     | 2020.02                     | +                         | 16          | +         | +    | +      | +      | +        |     |                                                                                           |
| GR     | 2016 (02.2020)              | +                         | 16          | +         | +    | +      | +      | +        | +   | +<br>all according to CH guidelines                                                       |
| JU     | 2016(2019.03)               | +                         | 16          | +         | +    | +      | +      | +        |     |                                                                                           |
| LU     | 2017                        | +                         | 16          | +         | +    | +      | +      | +        | +   | +<br>all according to CH guidelines                                                       |
| NE     | 2015                        | +                         | 16          | +         | +    |        |        |          | +   |                                                                                           |
| NW     | 2017                        | +                         | 16          | +         | +    | +      | +      | +        |     |                                                                                           |
| OW     | 2019                        | +                         | 16          | +         | +    | +      | +      | +        |     |                                                                                           |
| SG     | 2016                        | +                         | 16          | +         | +    |        |        |          |     |                                                                                           |
| SH     | 2016                        | +                         | 16          | +         | +    | +      | +      | +        |     |                                                                                           |
| SO     | 2015                        | +                         | 16          | +         | +    | +      | +      | +        | +   | +<br>all according to CH guidelines                                                       |
| SZ     | 2016                        | +                         | 16          | +         | +    | +      | +      | +        |     |                                                                                           |
| TI     |                             | R**                       |             |           |      |        |        |          |     |                                                                                           |
| TG     | 2016                        | +                         | 16          | +         | +    | +      | +      | +        | +   | +<br>all according to CH guidelines                                                       |
| UR     | 2019.05                     | +                         | >16         | +         | +    | +      | +      | +        |     |                                                                                           |
| VD     | 2016 (2017)                 | +                         | 16          | +         | +    | +      | +      | +        | +   |                                                                                           |
| VS     | 2016 (06.2019;02.2020)      | +                         | 16          | +         | +    |        |        |          |     | further vaccinations within the framework of campaigns (time-limited, cantonally defined) |
| ZG     | 2017                        | +                         | 16          | +         | +    | +      | +      | +        |     |                                                                                           |
| ZH     | 2015                        | +                         | 16          | +         | +    | +      | +      | +        |     |                                                                                           |

97 \*from 2<sup>nd</sup> dose, after initial vaccination by physician has taken place

98 \*\*R: Vaccination by prescription

99 Table as of: 02/25/2020

1  
2  
3 100 Since vaccination services overlap between the fields of activity of physicians and pharmacists, and  
4  
5 101 due to the potential for friction between these professional groups around issues of revenue and  
6  
7 102 authority, this topic merits further study, particularly in Switzerland where the opportunity to  
8  
9 103 vaccinate in pharmacies is relatively recent and pharmacists have a new role regarding vaccination  
10  
11 104 [23]. Since studies have shown that inter-professional interactions between pharmacists and general  
12  
13 105 practitioners could be considerably improved [29, 30], it is important to understand the impact of the  
14  
15 106 above mentioned inter-professional political issues on cooperation between physicians and  
16  
17 107 pharmacists.

18  
19  
20  
21 108 Here we provide a detailed qualitative characterization of the perspectives of key physician and  
22  
23 109 pharmacy stakeholders from professional societies, public health departments, and community  
24  
25 110 pharmacy boards on professional training, vaccination counseling and administration, and the  
26  
27 111 respective roles and competencies of physicians and pharmacists.

## 31 112 **METHODS**

32  
33  
34 113 We conducted this study in the context of the Swiss National Research Program 74 (NRP74) on  
35  
36 114 vaccine-hesitant patients and physicians in Switzerland [7, 38]. The study was approved by the local  
37  
38 115 ethics committee (Ethikkommission Nordwest- und Zentralschweiz). We obtained informed consent  
39  
40 116 from all participants.

41  
42  
43 117  
44  
45 118 We selected participants through purposive sampling. The principal investigator (author PT) recruited  
46  
47 119 all participants via publicly available email. Participants included stakeholders with a medical or  
48  
49 120 pharmacy degree, including public health authorities, heads of community pharmacy management  
50  
51 121 boards, and heads of professional medical and pharmacy associations (Table 2). A total of 20  
52  
53 122 stakeholders were contacted, of whom 1 declined to participate due to general lack of time, and 5  
54  
55 123 were unable to participate due to constraints related to the coronavirus pandemic. We interviewed  
56  
57 124 each participant once, with one interview conducted with two participants simultaneously.



1  
2  
3 125 We designed a semi-structured qualitative interview guide based on previous projects of the NRP74  
4  
5 126 vaccine hesitancy program [8, 39] and finalized it after several pilot interviews and revisions by team  
6  
7 127 members (supplementary file 1 and 2). The guide included questions designed to capture in-depth  
8  
9 128 insights about participants' perspectives on professional training and competence, vaccination  
10  
11 129 counseling in pharmacies, immunization rates, administration modalities, vaccination costs, and  
12  
13 130 mandatory vaccination. Several interviewees requested and received the interview guide from us in  
14  
15 131 advance.  
16  
17  
18  
19 132

20  
21  
22 133 We conducted interviews with participants in the German- and French-speaking regions of  
23  
24 134 Switzerland from February 2020 to April 2020. Two senior pharmacy students trained in qualitative  
25  
26 135 methods conducted the interviews (author MJ and author MAA). Before the interviews we  
27  
28 136 introduced ourselves as pharmacy students and stated our study objectives. We carried out the  
29  
30 137 interviews at the location requested by the participants, such as their offices or a local café. We took  
31  
32 138 field notes during the interview, but did not use them proactively in our analysis. All interviews were  
33  
34 139 audio-recorded and transcribed verbatim. We transcribed the interviews in the language of  
35  
36 140 utterance (German or French). The French interviews were then translated into German by a native  
37  
38 141 bilingual research team member. All quotes have been translated into English. To ensure anonymity,  
39  
40 142 we use pseudonyms throughout. The interviewers and the study research team assumed that  
41  
42 143 participants were in favor of and aware of the Swiss Vaccination Plan. Since we conducted this work  
43  
44 144 in Switzerland, we also, as researchers and clinicians, use the Swiss Vaccination Plan as the  
45  
46 145 benchmark against which we consider participants' views on vaccination. We regularly discussed  
47  
48 146 data interpretation in the team during the process of transcription. After several rounds of in-depth  
49  
50 147 readings, we developed a coding scheme. Coding allows data to be classified for subsequent,  
51  
52 148 systematic analyses.  
53  
54  
55  
56  
57  
58  
59  
60

1  
2  
3 149 Transcripts were coded and analyzed using thematic analysis, following Braun and Clarke's 6 phases  
4  
5 150 in order to organize and analyze the data [40]. We made use of the qualitative data analysis software  
6  
7 151 MAXQDA for coding and organising data. The analysis of the coding scheme and themes was  
8  
9  
10 152 reviewed independently by other group members. Data saturation was reached after 9 interviews  
11  
12 153 and confirmed with the following 4 interviews[41].  
13  
14

15 154 We grouped similar codes into themes and organized data into three main themes: (1) competence  
16  
17 155 of various health care providers (HCP) to provide vaccination counseling, (2) roles of physicians and  
18  
19 156 pharmacists in vaccination counseling, and (3) contribution of physicians and pharmacists to  
20  
21  
22 157 increasing immunization rates in Switzerland.  
23  
24

158

25  
26 159 The research team discussed any discrepancies in coding. We used the Consolidated criteria for  
27  
28 160 Reporting Qualitative research checklist (COREQ) as guidelines for reporting qualitative results, which  
29  
30 161 applies to all aspects of qualitative research [42]. Participants' exact professional affiliations are not  
31  
32 162 displayed in order to protect their identities. In the following sections, we will use the term clients to  
33  
34 163 refer to patients and clients, unless directly citing participants.  
35  
36

## 37 164 **Patient and Public Involvement**

165

38  
39  
40  
41 166 No patients were involved in this study.  
42  
43

167

## 44 168 **RESULTS**

45  
46  
47  
48  
49 169 Study participants had a medical (N=8) or pharmacy (N=6) professional background (Table 2). Two  
50  
51 170 participants with a medical background had additional training in complementary and alternative  
52  
53 171 medicine (CAM). The interviews lasted from 30 to 60 minutes, with an average of 44 minutes.  
54  
55

56  
57 172 We first illustrate who participants considered to be competent to provide vaccination counselling  
58  
59 173 and what formal requirements this should entail. Second, we describe participants' perspectives on  
60

174 the roles of the two main actors in vaccination counselling in Switzerland: physicians and  
 175 pharmacists. Third, we examine participants' suggestions for how physicians and pharmacists could  
 176 potentially contribute to increasing vaccination rates.

177

178 *Table 2: Participant Characteristics*

| <b>Pseudonym</b>             | <b>Language Region</b> | <b>Professional affiliation</b>                           | <b>Occupation</b> |
|------------------------------|------------------------|-----------------------------------------------------------|-------------------|
| <b>Dr. Tanner</b>            | German                 | Swiss Pharmacists Association                             | Pharmacist        |
| <b>Ms. Thies</b>             | German                 | Swiss Pharmacists Association                             | Pharmacist        |
| <b>Mr. Tschopp</b>           | German                 | Swiss Young Pharmacists Group                             | Pharmacist        |
| <b>Mr. Nagy</b>              | French                 | Head of a community pharmacy chain                        | Pharmacist        |
| <b>Ms. Zehnder</b>           | French                 | Chief pharmacist in public health<br>department           | Pharmacist        |
| <b>Ms. Bertschi</b>          | German                 | Chief pharmacist in public health<br>department           | Pharmacist        |
| <b>Dr. med. Camenzind</b>    | German                 | Swiss Federal Vaccination Commission                      | Physician         |
| <b>Dr. med. Felder</b>       | German                 | Swiss Association of Complementary<br>Medicine Physicians | Physician         |
| <b>Dr. med. Tiefenbacher</b> | German                 | Swiss Association of Paediatricians                       | Physician         |
| <b>Dr. med. Dahl</b>         | German                 | Swiss Society for General and Internal<br>Medicine        | Physician         |
| <b>Dr. med. Zeller</b>       | German                 | Major complementary medicine hospital                     | Physician         |
| <b>Dr. med. Müller</b>       | German                 | Swiss Medical Association                                 | Physician         |
| <b>Dr. med. Lehmann</b>      | German                 | Chief physician in public health department               | Physician         |

---

|                       |        |                                             |           |
|-----------------------|--------|---------------------------------------------|-----------|
| <b>Dr. med. Meyer</b> | French | Chief physician in public health department | Physician |
|-----------------------|--------|---------------------------------------------|-----------|

---

179

180

## 181 **Pharmacists are competent to provide vaccination counselling**

182 We asked participants which healthcare professionals were competent to provide vaccination  
183 counseling. All participants agreed that vaccination topics were "complex issues" and argued that  
184 sound expert knowledge about the different vaccines, their efficacy, safety, and how to deal with  
185 complications was required. Participants also emphasized the importance of knowing one's "own  
186 limits" and of seeking expert advice when uncertainties arise. Furthermore, they discussed how an  
187 interest in the topic of vaccinations and a fundamental knowledge base were prerequisites for  
188 providing scientific and objective advice and to be able to answer "tough" questions and provide in-  
189 depth information.

190 According to the participants' descriptions of competence, pharmacists, and physicians best meet  
191 criteria for competent vaccination counseling. As Ms. Tanner (Pharmacist, Swiss Pharmacists  
192 Association), explained, physicians and pharmacists both are qualified to provide vaccination  
193 counseling: "All things considered, to have a really good conversation with the client (...), for me, an  
194 academic background is necessary to have a good understanding of the information, of the  
195 immunology, so that you can explain a vaccine correctly. And that's why I feel that if a client wants to  
196 be informed in-depth, vaccination counseling currently belongs in the hands of physicians and  
197 pharmacists."

## 198 **Views on other healthcare professionals' vaccination competency**

199 Some of the participants explained that, in addition to physicians and pharmacists, other medical  
200 professionals who do not have university training, such as nurses, medical practice assistants, and

1  
2  
3 201 pharmacy assistants, could also be competent to provide appropriate vaccination advice. Ms.  
4  
5 202 Lehmann (chief physician, public health department) expressed that HCPs with various backgrounds  
6  
7 203 who obtain additional vaccination training are competent to provide high quality vaccination  
8  
9 204 counseling. Participants agreed that HCPs without university training could, at the very least, relieve  
10  
11 205 physicians and pharmacists by evaluating clients' vaccination status, asking certain triage questions  
12  
13  
14 206 or administering vaccines.  
15  
16

17 207  
18  
19  
20 208 Only one participant, Mr. Zeller (physician, Swiss CAM hospital), saw vaccination counseling and  
21  
22 209 administration as being outside of pharmacists' area of expertise. He explained that pharmacists who  
23  
24 210 vaccinate would "interfere" with the job of the physician, arguing that pharmacists would vaccinate  
25  
26 211 with other intentions; in his view, profit would be pharmacists' primary focus, meaning that there  
27  
28 212 would be a possible conflict of interest. He said that during the physician-patient encounter, the  
29  
30 213 primary goal is not selling and administering a vaccine, but to counsel the patient, to aid them in  
31  
32 214 their decision-making process, and to embed vaccination in the medical check-up visit.  
33  
34

### 35 36 215 **Limited vaccination training during medical school compared to excellent** 37 38 39 216 **vaccination education in pharmacy school** 40

41  
42  
43 217 When discussing how physicians and pharmacists acquired their vaccination counseling and  
44  
45 218 administration competence, participants considered HCPs' university education, post-graduate  
46  
47 219 training, and continuing education. Participants described how all physicians are allowed to vaccinate  
48  
49 220 after post-graduate training to obtain a medical specialist title. In contrast, pharmacists can only  
50  
51 221 vaccinate clients by meeting 2 conditions: 1) completing specific post-graduate training course  
52  
53 222 leading to a certificate of competence for vaccination; and 2) fulfilling regular continuing education  
54  
55 223 requirements. According to physician and pharmacist participants, the quality of vaccination  
56  
57  
58  
59  
60

1  
2  
3 224 counseling from physicians could be improved by increasing the content of their pre-graduate  
4  
5 225 vaccination training.  
6  
7  
8 226 All pharmacists agreed that vaccine education during pharmacy university training in Switzerland was  
9  
10 227 excellent, especially since 2016 when the vaccination content of the curriculum was updated.  
11  
12 228 According to Mr. Tschopp (pharmacist, Swiss Young Pharmacists Group), however, there is “room for  
13  
14 229 improvement” regarding communication training for both physicians and pharmacists.  
15  
16  
17 230 Opinions regarding coverage of vaccination topics in medical school differed. Most participants felt  
18  
19 231 that physicians received only limited and “superficial” training on vaccination. According to Mr.  
20  
21 232 Tiefenbacher (physician, Swiss association of paediatricians), vaccination is a topic that receives only  
22  
23 233 “marginal” attention in medical school. He pointed out: “I cannot remember many vaccine-specific  
24  
25 234 lectures [in medical school], let alone practical courses. (...) When I talk to medical students or have  
26  
27 235 master students with me who are in their fourth year [of medical school], or when I do one-on-one  
28  
29 236 student tutoring, vaccination for them is still a closed book.”  
30  
31  
32 237 In terms of post-graduate training, according to both physician and pharmacist participants,  
33  
34 238 pharmacists who have acquired the post-graduation vaccination certificate have obtained  
35  
36 239 “outstanding and stringent” training. In contrast, regarding post-graduate medical residency training,  
37  
38 240 some participants considered that the vaccination issues were not discussed in enough detail. Mr.  
39  
40 241 Tiefenbacher (physician, Swiss association of paediatricians) expressed wishing to be confronted with  
41  
42 242 vaccination questions “from the beginning on and more frequently” during post-graduate residency  
43  
44 243 training.  
45  
46  
47 244 Participants felt that pharmacists’ competence is ensured by continuing training they must undergo,  
48  
49 245 to maintain their vaccination certification. In contrast, physicians do not have to obtain any  
50  
51 246 continuing vaccine education. One pharmacist (Mr. Nagy, pharmacist, head of a community  
52  
53 247 pharmacy chain) argued how it is in the interest of physicians to receive additional training: “It is a  
54  
55 248 question of individual will. This is the advantage pharmacists have over physicians.” However, Mr.  
56  
57  
58  
59  
60

1  
2  
3 249 Meyer (chief physician, public health department) considered that regarding formal requirements for  
4  
5 250 vaccination administration, too much is required of pharmacists, whereas too little is demanded of  
6  
7 251 physicians. In his view, the rules for continuing education should be the same for both professions.  
8  
9

10 252

### 11 12 253 **Lack of inter-professional cooperation between physicians and pharmacists**

13  
14  
15  
16 254 In this section, we discuss stakeholders' different perspectives on inter-professional cooperation  
17  
18 255 between physicians and pharmacists when it comes to vaccination, a matter on which the interviews  
19  
20 256 revealed considerable disagreement. We illustrate the stakeholders' characterization of inter-  
21  
22 257 professional cooperation and how it should best be organized.  
23  
24

25  
26 258 According to most participants, ample communication and good working relationships on the same  
27  
28 259 professional level between physicians and pharmacists are important for collaboration to be  
29  
30 260 effective. As stated by the stakeholders from both disciplines, there is an unmet need for better  
31  
32 261 professional cooperation between physicians and pharmacists. Complex situations and uncertainties  
33  
34 262 regarding vaccine supply, appropriate indications, and complications could thus be resolved  
35  
36 263 together. Furthermore, incorporation of different physician and pharmacist perspectives would  
37  
38 264 ultimately improve the quality of care. Participants expressed how inter-professional cooperation  
39  
40 265 could allow "better access to and understanding of vaccination." Participants agreed that a primary  
41  
42 266 goal of inter-professional cooperation would be to put the patient at the center. Mr. Müller  
43  
44 267 (physician, Swiss Medical Association) succinctly summarized this point by arguing that vaccination  
45  
46 268 needs to be "easy for the people, right? That's the point."  
47  
48  
49

50  
51 269 Furthermore, participants argued how physicians and pharmacists should pursue common goals,  
52  
53 270 such as providing the best possible medical care and improving vaccination rates. For example, Ms.  
54  
55 271 Tanner (pharmacist, Swiss Pharmacists Association) stated, "[It's] not only the pharmacists. All actors  
56  
57 272 are important here. We have to assure somehow that we all pull together. That we respond to the  
58  
59  
60

1  
2  
3 273 level of knowledge of patients or vaccine-hesitant people so that they can be convinced, and  
4  
5 274 vaccination rates can be increased and health care costs reduced."  
6  
7  
8 275 However, participants described how, at present, inter-professional cooperation was mostly non-  
9  
10 276 existent. According to Ms. Dahl (physician, Swiss Society for General and Internal Medicine) the  
11  
12 277 reason for the lack of inter-professional cooperation was clear: "Cooperation between physicians and  
13  
14 278 pharmacists? I don't think there is any communication, sorry [laughs]." Mr. Meyer (chief physician,  
15  
16 279 public health department) explained how he felt that physicians and pharmacists "put up with each  
17  
18 280 other" but that there was "no cooperation." Mr. Müller (physician, Swiss Medical Association) even  
19  
20 281 described inter-professionalism as an "illusion".  
21  
22  
23  
24 282  
25  
26 283 According to participants, pharmacists' ability to vaccinate might be an important source of friction  
27  
28 284 for some physicians and thus the lacking inter-professional cooperation. Mr. Zeller (physician, major  
29  
30 285 swiss CAM hospital) stated that "prevention belongs in the hands of the physician." This sentiment  
31  
32 286 was echoed by other physician stakeholders. A common stereotype among physicians, according to  
33  
34 287 both medical and pharmacy stakeholders, was that pharmacists acted "like little physicians" when  
35  
36 288 they vaccinate or provide vaccination counseling. Another sentiment participants described involved  
37  
38 289 physicians having a "fear" of pharmacists overstepping their professional roles, which might bring  
39  
40 290 physicians in general to develop a "competitive" attitude with pharmacists. Participants explained  
41  
42 291 how there was a perception that pharmacists were "taking something away" from physicians by  
43  
44 292 being allowed to vaccinate.  
45  
46  
47  
48 293 Mr. Tiefenbacher (physician, Swiss association of paediatricians) explained this "skepticism" of  
49  
50 294 physicians towards pharmacists by detailing how vaccination was often the only contact between the  
51  
52 295 family physician and their healthy patients and that vaccination in pharmacies carried the potential  
53  
54 296 to eliminate physician-patient contact entirely. He clarified that physicians' skepticism was  
55  
56 297 attributable to the fact that pharmacists would try to sell "lots of things" in addition to vaccinations,  
57  
58 298 since pharmacies nowadays resemble "general stores".  
59  
60



1  
2  
3 299  
4  
5 300 Other participants stated that pharmacies were merely "an additional service" to the already existing  
6  
7 301 ones. Mr. Nagy (pharmacist, head of a community pharmacy chain) explained: "Pharmacies provide  
8  
9 302 care to individuals who have no family physician, who do not regularly see a physician, or have no  
10  
11 303 contact with any medical professional. The only medical profession with which they have contact is  
12  
13 304 the pharmacist. This will only *increase* immunization rates. There is no competition there, quite the  
14  
15 305 opposite."

16  
17  
18 306 Mr. Tschopp (pharmacist, Swiss Young Pharmacists Group) similarly pointed to vaccination in  
19  
20 307 pharmacies as "the best way" to reach people who never consult a physician.

21  
22  
23 308 Ms. Bertschi (chief pharmacist, public health department) explained that pharmacists should apply  
24  
25 309 all knowledge that they acquired during their training and that could be legally provided. Vaccination  
26  
27 310 being included in pharmacists' training was an obvious area of pharmacists' expertise. Furthermore,  
28  
29 311 all pharmacist participants stated that pharmacists, as trained HCPs, increasingly are considered key  
30  
31 312 providers of preventive medicine in Switzerland.

32  
33  
34 313  
35  
36 314 To improve the relationships between physicians and pharmacists, Mr. Nagy (pharmacist, head of a  
37  
38 315 community pharmacy chain) argued that joint workshops on vaccination topics for physicians and  
39  
40 316 pharmacists should be arranged. Mr. Tschopp (pharmacist, Swiss Young Pharmacists Group)  
41  
42 317 proposed joint social events to help physicians and pharmacists get to know each other better. Ms.  
43  
44 318 Felder (physician, association of CAM physicians) echoed this thought, "I think that inter-professional  
45  
46 319 cooperation can be fruitful. Together is always better than against each other, right?"

47  
48  
49 320 However, two participants felt that further cooperation was not necessary. Mr. Zeller (physician,  
50  
51 321 major CAM hospital) explained that this would lead to "complicate" rather than simplify matters.  
52  
53 322 According to him, pharmacist-physician cooperation would lead to difficulties in defining who is in  
54  
55 323 charge and responsible for vaccination decisions. Ms. Bertschi (chief pharmacist, public health  
56  
57  
58  
59  
60

1  
2  
3 324 department) also expressed skepticism: "Either the physician or pharmacist vaccinates. I do not see  
4  
5 325 much inter-professional cooperation here."  
6  
7

8 326  
9

## 10 327 Self-dispensation of medication in physicians' offices as a "counterpart" to 11 12 13 328 vaccination in pharmacies

14  
15  
16 329 Participating stakeholders discussed physicians' practice of selling medication in their offices directly  
17  
18 330 to their patients (self-dispensation), thereby generating significant financial revenue, potentially at  
19  
20 331 the disadvantage of the local pharmacy. On the other hand, vaccination in pharmacies might  
21  
22 332 generate revenue for the pharmacy, potentially disadvantaging local office physicians.  
23  
24  
25

26 333  
27

28 334 Several physician stakeholders reported that physicians and pharmacists should have "equal rights"  
29  
30 335 by arguing that self-dispensation by physicians should be allowed in Swiss cantons where vaccination  
31  
32 336 in pharmacies is allowed. Some pharmacists, however, noted that this was already largely the case.  
33  
34 337 Cantons with liberal laws on self-dispensation by physicians typically also promote vaccination in  
35  
36 338 pharmacies.  
37  
38

39 339  
40

41 340 Some pharmacists stated that self-dispensation and vaccination in pharmacies could not be directly  
42  
43 341 compared because vaccination in pharmacies was based on compulsory postgraduate training and  
44  
45 342 quality assurance requirements, whereas no further educational requirements are imposed on "self-  
46  
47 343 dispensing" physicians. Mr. Tschopp (pharmacist, Swiss Young Pharmacists Group) criticized this:  
48  
49 344 "This is all political. Self-dispensation is an unregulated system that is wildly proliferating in doctors'  
50  
51 345 offices. In contrast, vaccination in pharmacies is tightly regulated, and physicians and the authorities  
52  
53 346 keep a close eye on us. It's about economic privileges."  
54  
55  
56

57 347  
58  
59  
60

1  
2  
3 348 Despite the mentioned differences, both physician and pharmacist participants were overall  
4  
5 349 confident that cooperation between the two professions will improve. However, participants  
6  
7 350 discussed how pharmacists should not "push" and should "proceed in small steps," because it is  
8  
9 351 important that "trust must be built up and physicians must not get angry." This view was expressed  
10  
11 352 by both physician and pharmacist stakeholders.  
12  
13  
14 353

### 17 354 **Vaccination in pharmacies as a strategy to increase vaccination rates**

19  
20 355 We asked participants about the extent to which physicians and pharmacists could play roles in  
21  
22 356 increasing vaccination rates. Stakeholders explained that physicians and pharmacists play a key role  
23  
24 357 in this regard by providing vaccine information to patients and clients. Ms. Zehnder (chief  
25  
26 358 pharmacist, public health department) explained: "You have to provide people with information,  
27  
28 359 awareness, and responsibility, without the specter of fear." Participants described it being essential  
29  
30 360 to inform patients and clients "skillfully" so that the advice does not cause resistance. Physicians and  
31  
32 361 pharmacists often face difficult questions on vaccination and need to take sufficient time for  
33  
34 362 counseling such clients. Providers should face up to "untruths," misinformation, and outdated  
35  
36 363 information. Some stakeholders believed that misinformation leads to the development of  
37  
38 364 "vaccination sceptics" or "vaccine-hesitant" people. Mr. Meyer (chief physician, public health  
39  
40 365 department) argued how HCPs collectively needed to prevent this "minority" from "setting the  
41  
42 366 tone." Participants argued that it was important to educate vaccine-hesitant groups specifically. Mr.  
43  
44 367 Müller (physician, Swiss Medical Association) and Ms. Tanner (pharmacist, Swiss Pharmacists  
45  
46 368 Association) mentioned motivational interviewing techniques to better inform clients and guide  
47  
48 369 them towards their vaccine decisions. For Mr. Tschopp (pharmacist, Swiss Young Pharmacists Group),  
49  
50 370 vaccination counseling required an "emotional and trusting" relationship between pharmacists and  
51  
52 371 their clients. In his view, by providing correct and easily understandable information, the number of  
53  
54 372 people willing to be vaccinated would increase.  
55  
56  
57  
58  
59  
60

1  
2  
3 373 Two physicians specialized in complementary medicine stated that increasing vaccination rates in  
4  
5 374 Switzerland is not a priority for them. Ms. Felder (physician, association of CAM physicians) explained  
6  
7 375 that if the patient “had good reasons not to be vaccinated,” she would not try to persuade them to  
8  
9 376 get vaccinated just to increase vaccination rates. Rather, she argued that by providing “transparent”  
10  
11 377 and “individualized” vaccination counseling, patients should be able to make a more informed  
12  
13 378 vaccination decision. In her view, this will ultimately lead to increased vaccination rates. Mr. Zeller  
14  
15 379 (physician, major CAM hospital) put it bluntly: “I treat patients and not vaccination rates. My primary  
16  
17 380 goal is to protect those [with vaccines] who want to be protected, and to counsel them as objectively  
18  
19 381 as possible. Those who don’t want to be protected: well, they can do this, it’s their own  
20  
21 382 responsibility.”  
22  
23  
24  
25

26 383 Finally, pharmacy stakeholders suggested that different regulations in the Swiss cantons (states)  
27  
28 384 should be harmonized. Ms. Tanner (pharmacist, Swiss Pharmacists Association) stated: “Each canton  
29  
30 385 has different rules for vaccination in pharmacies - this makes no sense. The goal clearly is to increase  
31  
32 386 vaccination rates in the whole country.”  
33  
34  
35

36 387

## 39 388 **DISCUSSION**

40  
41  
42  
43 389 In this study, we provide a detailed characterization of key Swiss medical and pharmacy  
44  
45 390 stakeholders’ perspectives on vaccination in pharmacies. Stakeholders viewed both physicians and  
46  
47 391 pharmacists as competent to provide vaccination counseling. By providing low threshold access to  
48  
49 392 vaccination counseling, pharmacists play an important public health role, and vaccine administration  
50  
51 393 in pharmacies increases vaccination rates. However, stakeholders noted only limited professional  
52  
53 394 cooperation between pharmacists and physicians on vaccination and recommended improving  
54  
55 395 collaboration.  
56  
57  
58  
59  
60

1  
2  
3 396 The results of this study show how physicians and pharmacists in Switzerland serve as major actors  
4  
5 397 for providing high quality vaccination counseling and administering vaccines. This is in line with  
6  
7 398 previous studies [11, 14, 17, 43, 44]. For example, previous research has shown how pharmacists  
8  
9 399 have in-depth knowledge of physicochemical properties of drugs and vaccines, of pharmacology,  
10  
11 400 pharmacokinetics, drug interactions, and adverse drug effects [45, 46]. Interviewed stakeholders  
12  
13 401 discussed extensive pre- and post-graduate training as a key prerequisite for pharmacists'  
14  
15 402 vaccination competence. Schaffer et al. (2008) point out how pharmacists' willingness to complete  
16  
17 403 additional post-graduate vaccination training demonstrates their commitment and high level of  
18  
19 404 interest in the topic of vaccination [47]. Previous authors recorded that pharmacy students in  
20  
21 405 Switzerland receive more hours of training on vaccination topics as part of their curriculum than  
22  
23 406 medical students [28]. Several of our participants mentioned this as evidence that pharmacists are  
24  
25 407 well prepared for vaccination counseling and administration, perhaps even more so than physicians.  
26  
27  
28  
29  
30 408 Our results document a considerable potential for tension between physicians and pharmacists on  
31  
32 409 the topic of vaccination. In a 2014 report from Ireland, general practitioners expressed concern  
33  
34 410 about pharmacists vaccinating, questioning pharmacist's professional competence and ability to deal  
35  
36 411 with vaccine-related complications in the pharmacy [33]. Interestingly, most Swiss physician  
37  
38 412 stakeholders were supportive of vaccination in pharmacies as an important addition to vaccination in  
39  
40 413 physicians' offices. This could be interpreted as a favorable change in interprofessional attitudes in  
41  
42 414 recent years, with a welcome emphasis on physicians' and pharmacists' shared goal of achieving  
43  
44 415 success for national immunization programs by increasing vaccination rates. This phenomenon has  
45  
46 416 similarly been observed in the UK, where resistance from general practitioners towards pharmacists  
47  
48 417 vaccinating decreased over time [48]. Nevertheless, stakeholders also mentioned concerns about  
49  
50 418 pharmacists who vaccinate, potentially interfering with the financial wellbeing of physicians, by  
51  
52 419 taking customers and therefore revenue away from physicians. This is in line with previous reports  
53  
54 420 [17, 33]. The direct comparison by our stakeholders of selling medication by physicians in practice  
55  
56 421 with vaccination in pharmacies was an interesting observation that has not previously been  
57  
58  
59  
60

1  
2  
3 422 documented in Switzerland [49]. Pharmacists' concerns about loss of income and authority has also  
4  
5 423 been recorded in the US [35]. Importantly, selling medication constitutes a significant source of  
6  
7 424 revenue for "self-dispensing" physicians, representing the second largest distribution channel in the  
8  
9 425 Swiss drug market [23, 50]. In cantons where physician self-dispensation is allowed, the number of  
10  
11 426 pharmacies is lower than in the other cantons [37].  
12  
13  
14

15 427 Our findings underline the importance of considering financial aspects and highlight the extent to  
16  
17 428 which such decisions are politically charged and likely need to be resolved at a higher political level.  
18  
19 429 As the Swiss Federal Office of Public Health mentioned in a 2016 report, inter-professional  
20  
21 430 cooperation might meet fewer obstacles in cantons without self-dispensation of medicines by  
22  
23 431 physicians [23, 36]. In addition, the perceived potential for financial competition between physicians  
24  
25 432 and pharmacists in the private sector may provide a possible explanation for the currently limited  
26  
27 433 degree of cooperation between these professional groups.  
28  
29  
30

31 434 Similar to what has been shown in a previous report [31] and other research, study participants  
32  
33 435 discussed how inter-professional cooperation in the field of vaccination is likely to facilitate access to  
34  
35 436 vaccination information and delivery [14, 17], heightened awareness concerning vaccinations, and,  
36  
37 437 consequently, increased immunization rates [10, 51, 52]. This may concern particularly people with  
38  
39 438 previously little contact with healthcare systems, such as adolescents and healthy adults who have  
40  
41 439 no regular physician or socio-economically disadvantaged groups [14, 46]. Pharmacy and physician  
42  
43 440 stakeholders underscored how active communication and the provision of high quality information  
44  
45 441 on vaccination by the provider increases vaccination rates. This is in keeping with previous  
46  
47 442 observations, such as those of Grabenstein et al (1998) who found that patients are more likely to be  
48  
49 443 vaccinated if they were approached actively by the provider [17]. Active initiation of the conversation  
50  
51 444 by the provider, and the use of motivational interviewing [53] may be useful to respond to patient  
52  
53 445 needs [54]. Motivational interviewing has already been applied in the field of vaccination and has  
54  
55 446 been shown to be an effective approach in increasing vaccination intention and vaccination rates  
56  
57 447 when used by both pharmacists [54] and physicians [55, 56].  
58  
59  
60

1  
2  
3 448  
4  
5  
6 449  
7  
8

9 450

## STRENGTHS AND LIMITATIONS

451 Strengths of this study include a qualitative approach, which allowed us to gain a deeper  
452 understanding of the topic of vaccination in pharmacies from the participants' own perspectives. Our  
453 results provide novel insights into the opinions of key Swiss experts with both medical and pharmacy  
454 backgrounds. This is an understudied aspect in the field of vaccination services. By including  
455 stakeholders from German- and French-language regions of Switzerland, from public health,  
456 professional pharmacists and physicians organisations, complementary medicine and biomedicine,  
457 we obtained detailed insights into the views of a wide variety of key actors.

458 Qualitative studies have limitations. Our results reflect the opinions of a limited number of experts  
459 and should not be generalized. For qualitative interviewing, the interviewer effect [7] and the social  
460 desirability bias [57] may affected the information obtained. Given that our data was collected in the  
461 German- and French-speaking regions of Switzerland, translation of interviews into English might  
462 have altered the meaning of some statements due to language-specific nuances. That being said,  
463 language-related issues were discussed among the multilingual team throughout data analysis. These  
464 limitations can be addressed by including our study findings into future quantitative research that  
465 aims at studying similar issues on a wider scale.

## CONCLUSION

467 Our results suggest that promoting the integration of pharmacists as vaccine counselors and vaccine  
468 administrators should be considered to maintain successful national immunization programs. Health  
469 policymakers should consider more actively encouraging inter-professional cooperation between  
470 physicians and pharmacists which currently seems limited in Switzerland. Participants criticized the  
471 lack of uniform regulation for vaccination in pharmacies throughout Switzerland. Active initiation of

21

1  
2  
3 472 discussion of vaccines by pharmacists and physicians with their patients and providing high quality  
4  
5 473 vaccination advice may further contribute to increased immunization rates and improved  
6  
7 474 coordination between healthcare professionals in Switzerland.  
8  
9

## 10 11 475 **ACKNOWLEDGEMENTS** 12 13

14 476 We recognize the project's overall financial support from the Swiss National Science Foundation's  
15  
16 477 National Research Programme 74 (Grant 167398) and supplementary postdoctoral fellowship  
17  
18 478 funding from the Nora van Meeuwen-Haefliger-Foundation.  
19  
20

## 21 22 479 **AUTHOR CONTRIBUTIONS** 23 24 25

26 480 **MJ** coordinated qualitative data collection and evaluation and drafted the manuscript. **JT** and **MA**  
27  
28 481 participated regularly in study advisory board meetings and provided regular inputs about the  
29  
30 482 qualitative results. **MJD** took a lead role in establishing the study's qualitative methodologies and  
31  
32 483 provided regular study supervision, inputs about the qualitative results and valuable feedbacks  
33  
34 484 during the manuscripts writing. **PET** is the principal investigator, directed the funding request and  
35  
36 485 supervised the conduct of the study. He provided infectious disease and general medical expertise,  
37  
38 486 and oversaw study conception, design, data collection, analysis and interpretation.  
39  
40  
41  
42  
43  
44  
45  
46  
47  
48  
49  
50  
51  
52  
53  
54  
55  
56  
57  
58  
59  
60



1  
2  
3 487 All authors read, contributed to and approved the final manuscript.  
4  
5

6 488 **FUNDING SOURCE**  
7  
8  
9

10 489 This work was supported by the National Research Program NRP 74, grant number SNF 167398,  
11  
12 490 Switzerland.  
13  
14

15  
16 491 **COMPETING INTERESTS**  
17  
18

19 492 None declared.  
20  
21  
22

23 493 **DATA AVAILABILITY STATEMENT**  
24  
25

26 494 Data are available upon reasonable request.  
27  
28

29 495 **ETHICS STATEMENT**  
30  
31

32 496 The study was approved by the local ethics committee, Ethikkommission Nordwest- und  
33  
34 497 Zentralschweiz (EKNZ), project-ID: 2017-00725  
35  
36  
37

38 498 **ORCID**  
39  
40

41 499 Meliha Jusufoska: <https://orcid.org/0000-0002-6807-1900>  
42  
43  
44 500

45  
46  
47  
48 501 **REFERENCES**  
49  
50

- 51 502 1. Federal Office of Public Health. *French version: Couverture vaccinale des enfants âgés de 2,*  
52  
53 503 *8 et 16 ans en Suisse, 2014–2016.* 2018 [cited 2020 May 9]; Available from:  
54  
55 504 [https://www.bag.admin.ch/dam/bag/fr/dokumente/mt/i-und-b/durchimpfung/bu-24-18-](https://www.bag.admin.ch/dam/bag/fr/dokumente/mt/i-und-b/durchimpfung/bu-24-18-durchimpfung-2014-2016-de.pdf.download.pdf/bu-24-18-durchimpfung-2014-2016-fr.pdf)  
56  
57 505 [durchimpfung-2014-2016-de.pdf.download.pdf/bu-24-18-durchimpfung-2014-2016-fr.pdf](https://www.bag.admin.ch/dam/bag/fr/dokumente/mt/i-und-b/durchimpfung/bu-24-18-durchimpfung-2014-2016-de.pdf.download.pdf/bu-24-18-durchimpfung-2014-2016-fr.pdf).  
58  
59  
60

- 1  
2  
3 506 2. Federal Office of Public Health. *German version: Bericht zur Grippesaison 2018/19*. 2019  
4  
5 507 [cited 2020 May 9]; Available from:  
6  
7 508 <https://www.bag.admin.ch/dam/bag/de/dokumente/mt/infektionskrankheiten/grippe/saisonberic>  
8  
9 509 [ht-grippe-2018-19.pdf.download.pdf/saisonbericht-grippe-2018-19-de.pdf](https://www.bag.admin.ch/dam/bag/de/dokumente/mt/infektionskrankheiten/grippe/saisonberic-2018-19.pdf.download.pdf/saisonbericht-grippe-2018-19-de.pdf).
- 10 510 3. Tarr, P.E., M.J. Deml, and B.M. Huber, *Measles in Switzerland – progress made, but*  
11  
12 511 *communication challenges lie ahead*. *Swiss Med Wkly*. 2019;149:w20105.
- 13 512 4. Sheikh, S., et al., *A report on the status of vaccination in Europe*. *Vaccine*, 2018. **36**(33): p.  
14  
15 513 4979-4992.
- 16 514 5. Federal Office of Public Health. *National Vaccination Strategy - Short Version 2017* [cited  
17  
18 515 2020 May 5]; Available from: [https://www.bag.admin.ch/dam/bag/en/dokumente/mt/i-und-](https://www.bag.admin.ch/dam/bag/en/dokumente/mt/i-und-i-national-vaccination-strategy-short-version.pdf.download.pdf/national-vaccination-strategy-short-version.pdf)  
19  
20 516 [i-national-vaccination-strategy-short-version.pdf.download.pdf/national-vaccination-strategy-](https://www.bag.admin.ch/dam/bag/en/dokumente/mt/i-und-i-national-vaccination-strategy-short-version.pdf.download.pdf/national-vaccination-strategy-short-version.pdf)  
21  
22 517 [short-version.pdf](https://www.bag.admin.ch/dam/bag/en/dokumente/mt/i-und-i-national-vaccination-strategy-short-version.pdf.download.pdf/national-vaccination-strategy-short-version.pdf).
- 23 518 6. Kamal, K., S. Madhavan, and M. Amonkar, *Determinants of Adult Influenza and Pneumonia*  
24  
25 519 *Immunization Rates*. *Journal of the American Pharmacists Association*, 2003. **43**(3): p. 403-  
26  
27 520 411.
- 28 521 7. Deml, M.J., et al., *Determinants of vaccine hesitancy in Switzerland: study protocol of a*  
29  
30 522 *mixed-methods national research programme*. *BMJ Open*, 2019. **9**(11): p. e032218.
- 31 523 8. Deml, M.J., et al., *"We treat humans, not herds!": A qualitative study of complementary and*  
32  
33 524 *alternative medicine (CAM) providers' individualized approaches to vaccination in Switzerland*.  
34  
35 525 *Soc Sci Med*, 2019. **240**: p. 112556.
- 36 526 9. Federal Office of Public Health. *French version: Stratégie nationale de vaccination 2017* [cited  
37  
38 527 2020 October 14]; Available from: [https://www.bag.admin.ch/dam/bag/fr/dokumente/mt/i-und-](https://www.bag.admin.ch/dam/bag/fr/dokumente/mt/i-und-i-nsi-nsi-strategie-vollversion.pdf.download.pdf/nsi-strategie-vollversion-fr.pdf)  
39  
40 528 [i-nsi-nsi-strategie-vollversion.pdf.download.pdf/nsi-strategie-vollversion-fr.pdf](https://www.bag.admin.ch/dam/bag/fr/dokumente/mt/i-und-i-nsi-nsi-strategie-vollversion.pdf.download.pdf/nsi-strategie-vollversion-fr.pdf).
- 41 529 10. Vlahov, D., et al., *Strategies for Improving Influenza Immunization Rates among Hard-to-*  
42  
43 530 *Reach Populations*. *Journal of Urban Health*, 2007. **84**(4): p. 615-631.
- 44 531 11. Hogue, M.D., et al., *Pharmacist Involvement with Immunizations: A Decade of Professional*  
45  
46 532 *Advancement*. *Journal of the American Pharmacists Association*, 2006. **46**(2): p. 168-182.
- 47 533 12. Burson, R.C., et al., *Community pharmacies as sites of adult vaccination: A systematic review*.  
48  
49 534 *Human Vaccines & Immunotherapeutics*, 2016. **12**(12): p. 3146-3159.
- 50  
51  
52  
53  
54  
55  
56  
57  
58  
59  
60

- 1  
2  
3 535 13. Goad, J.A., et al., *Vaccinations Administered During Off-Clinic Hours at a National Community*  
4 536 *Pharmacy: Implications for Increasing Patient Access and Convenience*. The Annals of Family  
5 537 Medicine, 2013. **11**(5): p. 429-436.  
6  
7  
8 538 14. Isenor, J.E., et al., *Impact of pharmacists as immunizers on vaccination rates: A systematic*  
9 539 *review and meta-analysis*. Vaccine, 2016. **34**(47): p. 5708-5723.  
10  
11  
12 540 15. Anderson, C. and T. Thornley, *Who uses pharmacy for flu vaccinations? Population profiling*  
13 541 *through a UK pharmacy chain*. International Journal of Clinical Pharmacy, 2016. **38**: p. 218–  
14 542 222.  
15  
16  
17 543 16. Klepser, M.E., *Seasonal and pandemic influenza: Preparing pharmacists for the frontline*.  
18 544 Journal of the American Pharmacists Association, 2008. **48**(2): p. 312-314.  
19  
20  
21 545 17. Grabenstein, J., *Pharmacists as vaccine advocates: roles in community pharmacies, nursing*  
22 546 *homes, and hospitals*. Vaccine, 1998. **16**(18): p. 1705-1710.  
23  
24  
25 547 18. Valeri, F., et al., *Immunisation coverage of adults: a vaccination counselling campaign in the*  
26 548 *pharmacies in Switzerland*. Swiss Med Wkly. 2014;144:w13955.  
27  
28  
29 549 19. International Pharmaceutical Federation (FIP), *An overview of current pharmacy impact on*  
30 550 *immunisation: a global report 2016*. The Hague: International Pharmaceutical Federation,  
31 551 2016.  
32  
33  
34 552 20. Leuthold, C., O. Bugnon, and J. Berger, *The Role of Community Pharmacists in Travel Health*  
35 553 *and Vaccination in Switzerland*. Pharmacy (Basel), 2018. **6**(4).  
36  
37  
38 554 21. Anderson, C. and T. Thornley, *"It's easier in pharmacy": why some patients prefer to pay for*  
39 555 *flu jabs rather than use the National Health Service*. BMC Health Services Research, 2014.  
40 556 **14**.  
41  
42  
43 557 22. Federal Office of Public Health. *French version: Loi fédérale sur les professions médicales*  
44 558 *universitaires (SR 811.11, Loi sur les professions médicales, LPMéd), Art. 9*. 2006 [cited  
45 559 2020 May 8]; Available from: [https://www.admin.ch/opc/fr/classified-](https://www.admin.ch/opc/fr/classified-compilation/20040265/index.html)  
46 560 [compilation/20040265/index.html](https://www.admin.ch/opc/fr/classified-compilation/20040265/index.html).  
47  
48  
49 561 23. Federal Office of Public Health. *French version: Place des pharmacies dans les soins de*  
50 562 *base.Rapport du Conseil fédéral élaboré en réponse au postulat Humbel (12.3864) du 27*  
51 563 *septembre 2012*. 2016 [cited 2020 May 8]; Available from:  
52 564 <https://www.bag.admin.ch/dam/bag/fr/dokumente/nat->  
53  
54  
55  
56  
57  
58  
59  
60

- 1  
2  
3 565 [gesundheitspolitik/koordinierte\\_versorgung/verstaerkung\\_bestehender\\_aktivitaeten/po\\_12.38](#)  
4  
5 566 [64\\_bericht.pdf.download.pdf/po\\_12.3864\\_bericht\\_f\\_def.pdf](#).  
6  
7 567 24. The Federal Assembly-The Swiss Parliament. *French version: 12.3864 Postulat, Place des*  
8  
9 568 *pharmacies dans les soins de base*. 2012 [cited 2020 May 9]; Available from:  
10  
11 569 <https://www.parlament.ch/en/ratsbetrieb/suche-curia-vista/geschaefft?AffairId=20123864>.  
12  
13 570 25. Swiss Pharmacists Association. *German version: Liste der Impfungen nach Kanton, Stand*  
14  
15 571 *Februar 2020* 2020 [cited 2020 May 27]; Available from:  
16  
17 572 <https://impfapotheke.ch/assets/impfapotheken/liste-der-impfungen-nach-kanton-200225->  
18  
19 573 [de.pdf](#).  
20  
21 574 26. Foederatio Pharmaceutica Helvetiae. *German version: Fähigkeitsprogramm FPH Impfen und*  
22  
23 575 *Blutentnahme*. 2014/2015 [cited 2020 May 6]; Available from:  
24  
25 576 <https://www.pharmasuisse.org/data/docs/de/23096/F%C3%A4higkeitsprogramm-FPH-Impfen->  
26  
27 577 [und-Blutentnahme.pdf?v=1.0](#).  
28  
29 578 27. Federal Office of Public Health. *French version 1: Objectifs de formation en pharmacie selon*  
30  
31 579 *la LPMéd*. 2008 [cited 2020 May 8]; Available from:  
32  
33 580 <https://www.bag.admin.ch/dam/bag/fr/dokumente/berufe->  
34  
35 581 [gesundheitswesen/medizinalberufe/eidg-pruefungen-universitaerer-](#)  
36  
37 582 [medizinalberufe/pharmazie/lernzielkatalog-pharmazie-version-](#)  
38  
39 583 [1.pdf.download.pdf/lernzielkatalog-pharmazie.pdf](#).  
40  
41 584 28. Sottas, B., Kissmann, S. *German version: Ist-Analyse Aus-, Weiter- und Fortbildung im*  
42  
43 585 *Impfbereich. Schlussbericht. BAG*. 2019 [cited 2020 May 8]; Available from:  
44  
45 586 <https://www.bag.admin.ch/dam/bag/de/dokumente/mt/i-und-i/insi/bildung-impfen->  
46  
47 587 [gesundheitsberufe.pdf.download.pdf/bildung-impfen-gesundheitsberufe-de.pdf](#).  
48  
49 588 29. Bradley, F., D.M. Ashcroft, and N. Crossley, *Negotiating inter-professional interaction: playing*  
50  
51 589 *the general practitioner-pharmacist game*. *Sociology of Health & Illness*, 2018. **40**(3): p. 426-  
52  
53 590 444.  
54  
55 591 30. Cunningham, D.E., et al., *GP and pharmacist inter-professional learning – a grounded theory*  
56  
57 592 *study*. *Education for Primary Care*, 2016. **27**(3): p. 188-195.  
58  
59 593 31. Federal Office of Public Health. *Support programme «Interprofessionality in healthcare»*.  
60  
594 2017-2020 20.12.2020 [cited 2020 May 7]; Available from:

- 1  
2  
3 595 6  
7 597 [https://www.pharmasuisse.org/data/docs/de/20910/Faits-et-chiffres-2020.pdf?v=1.1](https://www.bag.admin.ch/bag/en/home/strategie-und-politik/nationale-<br/>8<br/>9 598 32. Hindi, A.M.K., E.I. Schafheutle, and S. Jacobs, <i>Community pharmacy integration within the<br/>10 599 <i>primary care pathway for people with long-term conditions: a focus group study of patients',</i><br/>11<br/>12 600 <i>pharmacists' and GPs' experiences and expectations.</i> BMC Family Practice, 2019. <b>20</b>.<br/>13<br/>14 601 33. Moore, T., J. Kennedy, and S. McCarthy, <i>Exploring the General Practitioner-pharmacist<br/>15 602 <i>relationship in the community setting in Ireland.</i> International Journal of Pharmacy Practice,<br/>16<br/>17 603 2014. <b>22</b>(5): p. 327-334.<br/>18<br/>19 604 34. Goldacre, B., et al., <i>Do doctors in dispensing practices with a financial conflict of interest<br/>20 605 <i>prescribe more expensive drugs? A cross-sectional analysis of English primary care</i><br/>21<br/>22 606 <i>prescribing data.</i> BMJ Open 2019, 2018. <b>9</b>.<br/>23<br/>24 607 35. David N. J, <i>Selling Drugs in the Physician's Office A Problem of Medical Ethics.</i> Philosophy<br/>25<br/>26 608 Documentation Center, 1992. <b>Vol. 11</b>: p. pp. 73-88.<br/>27<br/>28 609 36. Brügger, F.A., et al., <i>German Version: Interdisziplinäre Zusammenarbeit zwischen<br/>29 610 <i>Apotheker/innen und anderen universitären Medizinalpersonen und/oder</i><br/>30<br/>31 611 <i>Gesundheitsfachpersonen.</i> Büro für Arbeits- und Sozialpolitische Studien BASS AG, 2014.<br/>32<br/>33 612 37. Swiss Pharmacists Association. <i>French version: Faits et chiffres Pharmacies suisses 2020.</i><br/>34<br/>35 613 2020 [cited 2020 May 10]; Available from:<br/>36<br/>37 614 <a href=).  
38  
39 615 38. National Research Programme. *28 Vaccine-sceptical patients and doctors in Switzerland*  
40  
41 616 2020 [cited 2020 October 25]; Available from: 44  
45 618 39. Deml, M.J., et al., '*Problem patients and physicians' failures*': *What it means for doctors to*  
46  
47 619 *counsel vaccine hesitant patients in Switzerland.* Soc Sci Med, 2020. **255**: p. 112946.  
48  
49 620 40. Braun, V. and V. Clarke, *Using thematic analysis in psychology.* Qualitative Research in  
50  
51 621 Psychology, 2006. **3**(2): p. 77-101.  
52  
53 622 41. Guest, G., A. Bunce, and L. Johnson, *How Many Interviews Are Enough?: An Experiment with*  
54  
55 623 *Data Saturation and Variability.* . Field Methods., 2006. **18**(1): p. 59-82.  
56  
57  
58  
59  
60

- 1  
2  
3 624 42. Tong, A., P. Sainsbury, and J. Craig, *Consolidated criteria for reporting qualitative research*  
4  
5 625 *(COREQ): a 32-item checklist for interviews and focus groups*. *International Journal for*  
6  
7 626 *Quality in Health Care*, 2007. **19**(6): p. 349–57.
- 8  
9 627 43. Bartsch, S.M., et al., *Epidemiologic and economic impact of pharmacies as vaccination*  
10  
11 628 *locations during an influenza epidemic*. *Vaccine*, 2018. **36**(46): p. 7054-7063.
- 12  
13 629 44. Ernst, M.E., G.R. Bergus, and B.A. Sorofman, *Research: Patients' Acceptance of Traditional*  
14  
15 630 *and Nontraditional Immunization Providers*. *Journal of the American Pharmaceutical*  
16  
17 631 *Association* (1996), 2001. **41**(1): p. 53-59.
- 18  
19 632 45. Harding, G. and K. Taylor, *Pharmacy's strength lies in its blend of clinical, scientific and social*  
20  
21 633 *skills*. *The Pharmaceutical Journal*, 2004. **273**: p. 126.
- 22  
23 634 46. Valiquette, J.R. and P. Bedard, *Community pharmacists' knowledge, beliefs and attitudes*  
24  
25 635 *towards immunization in Quebec*. *Can J Public Health*, 2015. **106**(3): p. e89-94.
- 26  
27 636 47. Schaffer, S.J., et al., *How Effectively Can Health Care Settings Beyond the Traditional*  
28  
29 637 *Medical Home Provide Vaccines to Adolescents?* *Pediatrics*, 2008. **121**(Supplement 1): p.  
30  
31 638 S35-S45.
- 32  
33 639 48. Burns, C. *Pharmacies in England delivered 50% more flu jabs per pharmacy during*  
34  
35 640 *2020/2021 season*. *The Pharmaceutical Journal* 2021 [cited 2021 October 1]; Available from:  
36  
37 641 [https://pharmaceutical-journal.com/article/news/pharmacies-in-england-delivered-a-50-](https://pharmaceutical-journal.com/article/news/pharmacies-in-england-delivered-a-50-increase-in-flu-jabs-per-pharmacy)  
38  
39 642 [increase-in-flu-jabs-per-pharmacy](https://pharmaceutical-journal.com/article/news/pharmacies-in-england-delivered-a-50-increase-in-flu-jabs-per-pharmacy).
- 40  
41 643 49. Morton-Jones, T. and M. Pringle, *Dispensing by Physicians and Pharmacists A UK*  
42  
43 644 *Perspective*. *PharmacoEconomics*, 1994. **5**(1): p. 5-7.
- 44  
45 645 50. Interpharma mit Datengrundlage Quintiles Transnational Corp (IQVIA) Schweiz. *German*  
46  
47 646 *version: Pharma-Markt Schweiz* 2019 [cited 2020 May 11]; Available from:  
48  
49 647 [https://www.interpharma.ch/wp-content/uploads/2020/02/ly\\_iph.01.19.002\\_-](https://www.interpharma.ch/wp-content/uploads/2020/02/ly_iph.01.19.002_-_pharmamarkt_schweiz_2019_d_web-komprimiert.pdf)  
50  
51 648 [\\_pharmamarkt\\_schweiz\\_2019\\_d\\_web-komprimiert.pdf](https://www.interpharma.ch/wp-content/uploads/2020/02/ly_iph.01.19.002_-_pharmamarkt_schweiz_2019_d_web-komprimiert.pdf).
- 51  
52 649 51. Westrick, S.C., et al., *National survey of pharmacy-based immunization services*. *Vaccine*,  
53  
54 650 2018. **36**(37): p. 5657-5664.
- 55  
56 651 52. Rothholz, M.C., *Pharmacist-provided immunization compensation and recognition: White*  
57  
58 652 *paper summarizing APhA/AMCP stakeholder meeting*. *Journal of the American Pharmacists*  
59  
60 653 *Association*, 2011. **51**(6): p. 704-712.

- 1  
2  
3 654 53. Rollnick, S., et al., *Motivational interviewing*. BMJ, 2010. **340**(apr27 2): p. c1900-c1900.  
4  
5 655 54. Brackett, A., M. Butler, and L. Chapman, *Using motivational interviewing in the community*  
6  
7 656 *pharmacy to increase adult immunization readiness: A pilot evaluation*. Journal of the  
8  
9 657 American Pharmacists Association, 2015. **55**(2): p. 182-186.  
10  
11 658 55. Gagneur, A., V. Gosselin, and È. Dubé, *Motivational interviewing: A promising tool to address*  
12  
13 659 *vaccine hesitancy*. Vaccine, 2018. **36**(44): p. 6553-6555.  
14  
15 660 56. Gagneur, A., et al., *A postpartum vaccination promotion intervention using motivational*  
16  
17 661 *interviewing techniques improves short-term vaccine coverage: PromoVac study*. BMC Public  
18  
19 662 Health, 2018. **18**(1).  
20  
21 663 57. Grimm P. *Social Desirability Bias*. Wiley Online Library 2010 [cited 2020 December, 12];  
22  
23 664 Available from: <https://onlinelibrary.wiley.com/doi/abs/10.1002/9781444316568.wiem02057>.  
24  
25 665  
26  
27  
28 666 **Supplemental material- online only**  
29  
30 667  
31  
32  
33  
34  
35  
36  
37  
38  
39  
40  
41  
42  
43  
44  
45  
46  
47  
48  
49  
50  
51  
52  
53  
54  
55  
56  
57  
58  
59  
60

## Qualitative Interview Guideline pour les acteurs des autorités sanitaires, de la gestion, des associations

- 1) Pourriez-vous vous présenter brièvement et parler un peu de votre travail (titre) ?
  - En quoi consiste votre travail ?
  - Depuis combien de temps travaillez-vous dans le cadre de votre poste actuel ?
- 2) Pour notre programme national de recherche sur les décisions de vaccinations, nous comparons les points de vue de la médecine conventionnelle et de la médecine complémentaire sur la vaccination.  
Pouvez-vous nous dire ce que vous pensez de la médecine conventionnelle ? Et de la médecine complémentaire ?

### La vaccination : Convictions, coûts

- 3) Que pensez-vous de la vaccination ?
- 4) Dans le cadre de vos fonctions actuelles, êtes-vous en contact direct avec les patients/clients pour des questions liées à la vaccination ? Si oui, quelles sont les questions posées ?
- 5) Pensez-vous que le coût des vaccinations influence les décisions des gens ? Pourquoi ou pourquoi pas ?
- 6) Selon vous, quelle est la probabilité que les vaccinations et les conseils de vaccination en pharmacie soient remboursés par l'assurance de base à l'avenir ?
  - Pensez-vous que cela augmenterait le taux de vaccination ?  
(Par exemple, les vaccinations contre la grippe dans les pharmacies sont déjà couvertes par certains régimes d'assurance complémentaire).

### Croyances en matière de vaccination, la pratique de la vaccination et les recommandations de vaccination pour les clients et les patients

- 7) Où obtenez-vous vos informations sur les vaccinations ?
  - Exemple : collègues, plan de vaccination suisse/BAG, approche médicale
- 8) Selon vous, qui sont les professionnels de la santé compétents pour donner des conseils en matière de vaccination ? Pourquoi ? (exemple: si les pharmaciens ne sont pas mentionnés, demandez)
  - a) Que faut-il pour être compétent en matière de conseils de vaccination ?
- 9) Comment peut-on s'assurer que les médecins et les pharmaciens soient à jour en matière de vaccination ?
- 10) Pensez-vous que quelque chose devrait être changé dans la formation des pharmaciens et des médecins sur la vaccination et les conseils de vaccination ? Si oui, quoi ?
- 11) Pensez-vous qu'une coopération interprofessionnelle des pharmaciens et des médecins serait bénéfique pour augmenter les taux de vaccination ?
  - Comment pourriez-vous imaginer une telle coopération ?
  - L'Office fédéral de la santé publique doit-il intervenir au niveau fédéral ?
  - Exemple : cours de formation continue communs
- 12) Pourquoi les taux de vaccination sont-ils si différents d'un canton à l'autre ?



- 1  
2  
3 13) Dans certains cantons, les pharmaciens ne sont autorisés à administrer que certains vaccins  
4 (par exemple, le vaccin contre la grippe, encéphalite à tique (FSME)) ou seulement à certaines  
5 personnes (par exemple, âge >16 ans).  
6 • Quelle est votre position à ce sujet ?  
7 • Cette réglementation (quels vaccins peuvent être administrés par une pharmacie à  
8 quelles personnes) devrait-elle être uniforme à l'échelle nationale?  
9
- 10  
11 14) Que faut-il faire en Suisse pour augmenter les taux de vaccination et contre le scepticisme à  
12 l'égard de la vaccination ?  
13 • Quel est le rôle des autorités sanitaires, des médecins et des pharmaciens ?  
14
- 15 15) 1) A votre avis, les personnes en Suisse sont-elles suffisamment vaccinées ?  
16 • Cette approche ne pourrait-elle être utilisée que pour le vaccin contre la grippe ?  
17 • Pour le vaccin HPV ?  
18 • Pour le vaccin rougeole ?  
19
- 20 16) La vaccination en pharmacie est-elle un moyen efficace d'augmenter les taux de vaccination ?  
21 • Cette approche ne pourrait-elle être utilisée que pour le vaccin contre la grippe?  
22 • Pour le vaccin HPV ?  
23 • Pour le vaccin rougeole ?  
24  
25
- 26 17) Avez-vous remarqué des changements ces dernières années depuis 2015, quand la vaccination  
27 est devenue possible dans les pharmacies en Suisse ?  
28 • En ce qui concerne les taux de vaccination  
29 • En ce qui concerne les coûts de la santé  
30
- 31 18) Pensez-vous que les vaccinations devraient être une décision individuelle pour les familles?  
32 • Pourquoi ou pourquoi pas ?  
33 • Les considérations de santé publique doivent-elles jouer un rôle (par exemple,  
34 l'immunité de groupe) ?  
35 • Pourquoi ou pourquoi pas ?  
36  
37
- 38 19) Dans certains pays, une vaccination obligatoire a été envisagée ou existe déjà. Qu'en pensez-  
39 vous ?  
40 • En avez-vous déjà discuté avec vos collègues ?  
41
- 42 20) Aujourd'hui, il est parfois compliqué de se faire vacciner  
43 • Exemple pour le vaccin HPV - 26 programmes cantonaux de vaccination différents  
44 • Exemple : programmes de vaccination scolaire dans certains cantons, mais pas dans  
45 tous  
46 - Existe-t-il des moyens de simplifier le processus de vaccination en Suisse ?  
47

## 48 Conclusion

- 49  
50 21) En conclusion, quels sont les éléments les plus importants à considérer concernant la  
51 vaccination dans les pharmacies ?  
52  
53 22) Est-ce que vous aimeriez clarifier quelque chose dont nous avons discuté ? Aimeriez-vous  
54 rajouter quelque chose ? Vous avez des questions pour moi ?  
55  
56  
57  
58  
59  
60

## Qualitative Interview Guideline für die Stakeholder von Gesundheitsbehörden, Geschäftsleitungen, Verbänden

- 1) Können Sie etwas über sich selbst und kurz über Ihren Job(-titel) erzählen?
  - Was gehört zu Ihrem Aufgabenbereich?
  - Wie würden Sie sich einer Kolleg\*in vorstellen?
  - Wie lange arbeiten sie schon an Ihrem aktuellen Arbeitsort?
- 2) Für unser Nationales Forschungsprogramm zu Impfskepsis vergleichen wir die Ansichten der Schul- und Komplementärmedizin in Bezug auf Impfungen. Könnten Sie etwas dazu sagen, wie Sie zu Schul- und Komplementärmedizin stehen ?

### Impfungen: Überzeugungen, Kosten

- 3) Was denken Sie über Impfungen?
- 4) Haben Sie direkten Kontakt zu Patient\*innen/Kund\*innen über Impffragen in Ihrer jetzigen Funktion? Wenn ja, welchen?
- 5) Haben Sie das Gefühl, dass die Kosten der Impfungen die Entscheidung der Leute beeinflusst? Warum oder warum nicht?
- 6) Was denken Sie, wie stehen die Chancen, dass Impfungen und Impfberatungen in Apotheken von der Grundversicherung in Zukunft vergütet werden?
  - Denken Sie das würde die Impfrate steigern?  
(Z.B. werden Influenza Impfungen in Apotheken von manchen Zusatzversicherungen bereits übernommen.)

### Impfkenntnisse, Impfpraxis und Impfeempfehlungen:

- 7) Wo informieren Sie sich über Impfungen?
  - Probe: Kolleg\*innen, Schweizer Impfplan/BAG, spezifischer medizinischer Ansatz, Internet, Literatur/Bücher, ...
- 8) Welche Medizinalpersonen sind Ihrer Meinung nach kompetent, Impfberatungen zu machen? Warum? (probe: Falls Apotheker\*innen nicht erwähnt werden, nachfragen)
  - Was braucht es um kompetent für Impfberatung zu sein?
- 9) Wie kann sichergestellt werden, dass Ärzt\*innen und Apotheker\*innen in Bezug auf Impfungen auf dem neusten Stand sind?
- 10) Sollte man Ihrer Meinung nach etwas an der Ausbildung der Apotheker\*innen und Ärzt\*innen über Impfen und Impfberatung ändern? Wenn ja, was?
- 11) Denken Sie eine interprofessionelle Zusammenarbeit der Apotheker\*innen und Ärzt\*innen wäre von Vorteil um die Impfraten zu erhöhen?
  - Wie könnten Sie sich so eine Zusammenarbeit vorstellen?
  - Muss das Bundesamt für Gesundheit auf Bundesebene eingreifen?
    - Probe: gemeinsame Fortbildungen
- 12) Warum unterscheiden sich die Impfraten in den einzelnen Kantonen so stark?
  - Woran liegt das?

- 1  
2  
3 13) In einigen Kantonen dürfen Apotheker\*innen nur bestimmte Impfungen (z.B. Grippeimpfung,  
4 FSME) oder nur an bestimmte Personen durchführen (z.B. Alter >16).  
5 • Wie stehen Sie dazu?  
6 • Sollten diese Bestimmungen (welche Impfungen darf eine Apotheke bei welchen  
7 Personen durchführen) landesweit einheitlich werden?  
8  
9  
10 14) Was soll in der Schweiz gemacht werden, um die Impfraten zu erhöhen und der Impfskepsis  
11 entgegenzuwirken?  
12 • Welche Rolle spielen da die Gesundheitsbehörden, die Ärzt\*innen und die  
13 Apotheker\*innen?  
14  
15  
16 15) Sind Ihrer Meinung nach in der Schweiz die Leute genug geimpft?  
17 • Grippe  
18 • HPV  
19 • Masern  
20  
21  
22 16) Ist das Impfen in den Apotheken ein wirksames Mittel, um die Impfraten zu erhöhen?  
23 • nur bzgl. Grippeimpfung?  
24 • auch bzgl. HPV Impfung?  
25 • auch bzgl. Masernimpfung?  
26  
27  
28 17) Merken Sie Veränderungen in den letzten Jahren, seit das Impfen in Apotheken in der  
29 Schweiz möglich ist (seit 2015)?  
30 • bzgl. Impfraten  
31 • bzgl. Gesundheitskosten  
32  
33  
34 18) Denken Sie Impfungen sollten eine individuelle Entscheidung für Familien sein?  
35 • Warum oder warum nicht?  
36 • Sollten Public Health Überlegungen eine Rolle spielen (z.B. Herdimmunität)?  
37 • Warum oder warum nicht?  
38  
39  
40 19) In einigen Ländern wurde ein Impfblogatorium in Betracht gezogen oder es besteht bereits  
41 eines. Wie stehen Sie dazu?  
42 • Haben Sie schon mal mit Ihren Kolleg\*innen darüber diskutiert?  
43  
44  
45 20) Heute ist es teils kompliziert, sich impfen zu lassen  
46 • Bsp.: HPV – 26 verschiedene kantonale Impfprogramme  
47 • Bsp.: Schul-Impfprogramme in gewissen aber nicht in allen Kantonen.  
48 • Gibt es Möglichkeiten, um den Impfprozess in der Schweiz zu vereinfachen?  
49 • Könnte das Impfen in Apotheken dabei helfen?  
50

## 51 Schlussfolgerung

- 52  
53 21) Als Schlussfolgerung, was sind Ihre wichtigsten Überlegungen zum Impfen in Apotheken?  
54  
55 22) Möchten Sie noch etwas klarstellen/berichtigen? etwas ergänzen? Haben Sie Fragen?  
56  
57  
58  
59  
60

## COREQ (COnsolidated criteria for REporting Qualitative research) Checklist

A checklist of items that should be included in reports of qualitative research. You must report the page number in your manuscript where you consider each of the items listed in this checklist. If you have not included this information, either revise your manuscript accordingly before submitting or note N/A.

| Topic                                          | Item No. | Guide Questions/Description                                                                                                                              | Reported on Page No. |
|------------------------------------------------|----------|----------------------------------------------------------------------------------------------------------------------------------------------------------|----------------------|
| <b>Domain 1: Research team and reflexivity</b> |          |                                                                                                                                                          |                      |
| <i>Personal characteristics</i>                |          |                                                                                                                                                          |                      |
| Interviewer/facilitator                        | 1        | Which author/s conducted the interview or focus group?                                                                                                   |                      |
| Credentials                                    | 2        | What were the researcher's credentials? E.g. PhD, MD                                                                                                     |                      |
| Occupation                                     | 3        | What was their occupation at the time of the study?                                                                                                      |                      |
| Gender                                         | 4        | Was the researcher male or female?                                                                                                                       |                      |
| Experience and training                        | 5        | What experience or training did the researcher have?                                                                                                     |                      |
| <i>Relationship with participants</i>          |          |                                                                                                                                                          |                      |
| Relationship established                       | 6        | Was a relationship established prior to study commencement?                                                                                              |                      |
| Participant knowledge of the interviewer       | 7        | What did the participants know about the researcher? e.g. personal goals, reasons for doing the research                                                 |                      |
| Interviewer characteristics                    | 8        | What characteristics were reported about the interviewer/facilitator? e.g. Bias, assumptions, reasons and interests in the research topic                |                      |
| <b>Domain 2: Study design</b>                  |          |                                                                                                                                                          |                      |
| <i>Theoretical framework</i>                   |          |                                                                                                                                                          |                      |
| Methodological orientation and Theory          | 9        | What methodological orientation was stated to underpin the study? e.g. grounded theory, discourse analysis, ethnography, phenomenology, content analysis |                      |
| <i>Participant selection</i>                   |          |                                                                                                                                                          |                      |
| Sampling                                       | 10       | How were participants selected? e.g. purposive, convenience, consecutive, snowball                                                                       |                      |
| Method of approach                             | 11       | How were participants approached? e.g. face-to-face, telephone, mail, email                                                                              |                      |
| Sample size                                    | 12       | How many participants were in the study?                                                                                                                 |                      |
| Non-participation                              | 13       | How many people refused to participate or dropped out? Reasons?                                                                                          |                      |
| <i>Setting</i>                                 |          |                                                                                                                                                          |                      |
| Setting of data collection                     | 14       | Where was the data collected? e.g. home, clinic, workplace                                                                                               |                      |
| Presence of non-participants                   | 15       | Was anyone else present besides the participants and researchers?                                                                                        |                      |
| Description of sample                          | 16       | What are the important characteristics of the sample? e.g. demographic data, date                                                                        |                      |
| <i>Data collection</i>                         |          |                                                                                                                                                          |                      |
| Interview guide                                | 17       | Were questions, prompts, guides provided by the authors? Was it pilot tested?                                                                            |                      |
| Repeat interviews                              | 18       | Were repeat interviews carried out? If yes, how many?                                                                                                    |                      |
| Audio/visual recording                         | 19       | Did the research use audio or visual recording to collect the data?                                                                                      |                      |
| Field notes                                    | 20       | Were field notes made during and/or after the interview or focus group?                                                                                  |                      |
| Duration                                       | 21       | What was the duration of the interviews or focus group?                                                                                                  |                      |
| Data saturation                                | 22       | Was data saturation discussed?                                                                                                                           |                      |
| Transcripts returned                           | 23       | Were transcripts returned to participants for comment and/or                                                                                             |                      |

| Topic                                  | Item No. | Guide Questions/Description                                                                                                        | Reported on Page No. |
|----------------------------------------|----------|------------------------------------------------------------------------------------------------------------------------------------|----------------------|
|                                        |          | correction?                                                                                                                        |                      |
| <b>Domain 3: analysis and findings</b> |          |                                                                                                                                    |                      |
| <i>Data analysis</i>                   |          |                                                                                                                                    |                      |
| Number of data coders                  | 24       | How many data coders coded the data?                                                                                               |                      |
| Description of the coding tree         | 25       | Did authors provide a description of the coding tree?                                                                              |                      |
| Derivation of themes                   | 26       | Were themes identified in advance or derived from the data?                                                                        |                      |
| Software                               | 27       | What software, if applicable, was used to manage the data?                                                                         |                      |
| Participant checking                   | 28       | Did participants provide feedback on the findings?                                                                                 |                      |
| <i>Reporting</i>                       |          |                                                                                                                                    |                      |
| Quotations presented                   | 29       | Were participant quotations presented to illustrate the themes/findings?<br>Was each quotation identified? e.g. participant number |                      |
| Data and findings consistent           | 30       | Was there consistency between the data presented and the findings?                                                                 |                      |
| Clarity of major themes                | 31       | Were major themes clearly presented in the findings?                                                                               |                      |
| Clarity of minor themes                | 32       | Is there a description of diverse cases or discussion of minor themes?                                                             |                      |

Developed from: Tong A, Sainsbury P, Craig J. Consolidated criteria for reporting qualitative research (COREQ): a 32-item checklist for interviews and focus groups. *International Journal for Quality in Health Care*. 2007. Volume 19, Number 6: pp. 349 – 357

**Once you have completed this checklist, please save a copy and upload it as part of your submission. DO NOT include this checklist as part of the main manuscript document. It must be uploaded as a separate file.**
