# Supplementary material for: “Vaccination needs to be easy for the people, right ?”: a qualitative study of the roles of physicians and pharmacists regarding vaccination in Switzerland
Source: PubMed Central journal article supplement — BMJ Open. 2021 Dec 17;11(12):e053163. doi: 10.1136/bmjopen-2021-053163 (PMC8685942; doi:10.1136/bmjopen-2021-053163), 2021-12-17
Supplement: bmjopen-2021-053163supp001.pdf [file bmjopen-2021-053163supp001.pdf]

**Qualitative Interview Guideline pour les acteurs des autorités sanitaires, de la gestion, des associations**

- 1) Pourriez-vous vous présenter brièvement et parler un peu de votre travail (titre) ?
  - En quoi consiste votre travail ?
  - Depuis combien de temps travaillez-vous dans le cadre de votre poste actuel ?
- 2) Pour notre programme national de recherche sur les décisions de vaccinations, nous comparons les points de vue de la médecine conventionnelle et de la médecine complémentaire sur la vaccination.  
Pouvez-vous nous dire ce que vous pensez de la médecine conventionnelle ? Et de la médecine complémentaire ?

**La vaccination : Convictions, coûts**

- 3) Que pensez-vous de la vaccination ?
- 4) Dans le cadre de vos fonctions actuelles, êtes-vous en contact direct avec les patients/clients pour des questions liées à la vaccination ? Si oui, quelles sont les questions posées ?
- 5) Pensez-vous que le coût des vaccinations influence les décisions des gens ? Pourquoi ou pourquoi pas ?
- 6) Selon vous, quelle est la probabilité que les vaccinations et les conseils de vaccination en pharmacie soient remboursés par l'assurance de base à l'avenir ?
  - Pensez-vous que cela augmenterait le taux de vaccination ?  
(Par exemple, les vaccinations contre la grippe dans les pharmacies sont déjà couvertes par certains régimes d'assurance complémentaire).

**Croyances en matière de vaccination, la pratique de la vaccination et les recommandations de vaccination pour les clients et les patients**

- 7) Où obtenez-vous vos informations sur les vaccinations ?
  - Exemple : collègues, plan de vaccination suisse/BAG, approche médicale
- 8) Selon vous, qui sont les professionnels de la santé compétents pour donner des conseils en matière de vaccination ? Pourquoi ? (exemple: si les pharmaciens ne sont pas mentionnés, demandez)
  - a) Que faut-il pour être compétent en matière de conseils de vaccination ?
- 9) Comment peut-on s'assurer que les médecins et les pharmaciens soient à jour en matière de vaccination ?
- 10) Pensez-vous que quelque chose devrait être changé dans la formation des pharmaciens et des médecins sur la vaccination et les conseils de vaccination ? Si oui, quoi ?
- 11) Pensez-vous qu'une coopération interprofessionnelle des pharmaciens et des médecins serait bénéfique pour augmenter les taux de vaccination ?
  - Comment pourriez-vous imaginer une telle coopération ?
  - L'Office fédéral de la santé publique doit-il intervenir au niveau fédéral ?
  - Exemple : cours de formation continue communs
- 12) Pourquoi les taux de vaccination sont-ils si différents d'un canton à l'autre ?

- 13) Dans certains cantons, les pharmaciens ne sont autorisés à administrer que certains vaccins (par exemple, le vaccin contre la grippe, encéphalite à tique (FSME)) ou seulement à certaines personnes (par exemple, âge >16 ans).
- Quelle est votre position à ce sujet ?
  - Cette réglementation (quels vaccins peuvent être administrés par une pharmacie à quelles personnes) devrait-elle être uniforme à l'échelle nationale?
- 14) Que faut-il faire en Suisse pour augmenter les taux de vaccination et contre le scepticisme à l'égard de la vaccination ?
- Quel est le rôle des autorités sanitaires, des médecins et des pharmaciens ?
- 15) 1) A votre avis, les personnes en Suisse sont-elles suffisamment vaccinées ?
- Cette approche ne pourrait-elle être utilisée que pour le vaccin contre la grippe ?
  - Pour le vaccin HPV ?
  - Pour le vaccin rougeole ?
- 16) La vaccination en pharmacie est-elle un moyen efficace d'augmenter les taux de vaccination ?
- Cette approche ne pourrait-elle être utilisée que pour le vaccin contre la grippe?
  - Pour le vaccin HPV ?
  - Pour le vaccin rougeole ?
- 17) Avez-vous remarqué des changements ces dernières années depuis 2015, quand la vaccination est devenue possible dans les pharmacies en Suisse ?
- En ce qui concerne les taux de vaccination
  - En ce qui concerne les coûts de la santé
- 18) Pensez-vous que les vaccinations devraient être une décision individuelle pour les familles?
- Pourquoi ou pourquoi pas ?
  - Les considérations de santé publique doivent-elles jouer un rôle (par exemple, l'immunité de groupe) ?
  - Pourquoi ou pourquoi pas ?
- 19) Dans certains pays, une vaccination obligatoire a été envisagée ou existe déjà. Qu'en pensez-vous ?
- En avez-vous déjà discuté avec vos collègues ?
- 20) Aujourd'hui, il est parfois compliqué de se faire vacciner
- Exemple pour le vaccin HPV - 26 programmes cantonaux de vaccination différents
  - Exemple : programmes de vaccination scolaire dans certains cantons, mais pas dans tous
  - Existe-t-il des moyens de simplifier le processus de vaccination en Suisse ?

## Conclusion

- 21) En conclusion, quels sont les éléments les plus importants à considérer concernant la vaccination dans les pharmacies ?
- 22) Est-ce que vous aimeriez clarifier quelque chose dont nous avons discuté ? Aimeriez-vous rajouter quelque chose ? Vous avez des questions pour moi ?
