# Supplementary material for: “Vaccination needs to be easy for the people, right ?”: a qualitative study of the roles of physicians and pharmacists regarding vaccination in Switzerland
Source: PubMed Central journal article supplement — BMJ Open. 2021 Dec 17;11(12):e053163. doi: 10.1136/bmjopen-2021-053163 (PMC8685942; doi:10.1136/bmjopen-2021-053163), 2021-12-17
Supplement: bmjopen-2021-053163supp002.pdf [file bmjopen-2021-053163supp002.pdf]

### **Qualitative Interview Guideline für die Stakeholder von Gesundheitsbehörden, Geschäftsleitungen, Verbänden**

- 1) Können Sie etwas über sich selbst und kurz über Ihren Job(-titel) erzählen?
  - Was gehört zu Ihrem Aufgabenbereich?
  - Wie würden Sie sich einer Kolleg\*in vorstellen?
  - Wie lange arbeiten sie schon an Ihrem aktuellen Arbeitsort?
- 2) Für unser Nationales Forschungsprogramm zu Impfskepsis vergleichen wir die Ansichten der Schul- und Komplementärmedizin in Bezug auf Impfungen. Könnten Sie etwas dazu sagen, wie Sie zu Schul- und Komplementärmedizin stehen ?

### **Impfungen: Überzeugungen, Kosten**

- 3) Was denken Sie über Impfungen?
- 4) Haben Sie direkten Kontakt zu Patient\*innen/Kund\*innen über Impffragen in Ihrer jetzigen Funktion? Wenn ja, welchen?
- 5) Haben Sie das Gefühl, dass die Kosten der Impfungen die Entscheidung der Leute beeinflusst? Warum oder warum nicht?
- 6) Was denken Sie, wie stehen die Chancen, dass Impfungen und Impfberatungen in Apotheken von der Grundversicherung in Zukunft vergütet werden?
  - Denken Sie das würde die Impfrate steigern?  
(Z.B. werden Influenza Impfungen in Apotheken von manchen Zusatzversicherungen bereits übernommen.)

### **Impfkenntnisse, Impfpraxis und Impfeempfehlungen:**

- 7) Wo informieren Sie sich über Impfungen?
  - Probe: Kolleg\*innen, Schweizer Impfplan/BAG, spezifischer medizinischer Ansatz, Internet, Literatur/Bücher, ...
- 8) Welche Medizinalpersonen sind Ihrer Meinung nach kompetent, Impfberatungen zu machen? Warum? (probe: Falls Apotheker\*innen nicht erwähnt werden, nachfragen)
  - Was braucht es um kompetent für Impfberatung zu sein?
- 9) Wie kann sichergestellt werden, dass Ärzt\*innen und Apotheker\*innen in Bezug auf Impfungen auf dem neusten Stand sind?
- 10) Sollte man Ihrer Meinung nach etwas an der Ausbildung der Apotheker\*innen und Ärzt\*innen über Impfen und Impfberatung ändern? Wenn ja, was?
- 11) Denken Sie eine interprofessionelle Zusammenarbeit der Apotheker\*innen und Ärzt\*innen wäre von Vorteil um die Impfraten zu erhöhen?
  - Wie könnten Sie sich so eine Zusammenarbeit vorstellen?
  - Muss das Bundesamt für Gesundheit auf Bundesebene eingreifen?
    - Probe: gemeinsame Fortbildungen
- 12) Warum unterscheiden sich die Impfraten in den einzelnen Kantonen so stark?
  - Woran liegt das?

- 13) In einigen Kantonen dürfen Apotheker\*innen nur bestimmte Impfungen (z.B. Grippeimpfung, FSME) oder nur an bestimmte Personen durchführen (z.B. Alter >16).
- Wie stehen Sie dazu?
  - Sollten diese Bestimmungen (welche Impfungen darf eine Apotheke bei welchen Personen durchführen) landesweit einheitlich werden?
- 14) Was soll in der Schweiz gemacht werden, um die Impfraten zu erhöhen und der Impfskepsis entgegenzuwirken?
- Welche Rolle spielen da die Gesundheitsbehörden, die Ärzt\*innen und die Apotheker\*innen?
- 15) Sind Ihrer Meinung nach in der Schweiz die Leute genug geimpft?
- Grippe
  - HPV
  - Masern
- 16) Ist das Impfen in den Apotheken ein wirksames Mittel, um die Impfraten zu erhöhen?
- nur bzgl. Grippeimpfung?
  - auch bzgl. HPV Impfung?
  - auch bzgl. Masernimpfung?
- 17) Merken Sie Veränderungen in den letzten Jahren, seit das Impfen in Apotheken in der Schweiz möglich ist (seit 2015)?
- bzgl. Impfraten
  - bzgl. Gesundheitskosten
- 18) Denken Sie Impfungen sollten eine individuelle Entscheidung für Familien sein?
- Warum oder warum nicht?
  - Sollten Public Health Überlegungen eine Rolle spielen (z.B. Herdimmunität)?
  - Warum oder warum nicht?
- 19) In einigen Ländern wurde ein Impfblogatorium in Betracht gezogen oder es besteht bereits eines. Wie stehen Sie dazu?
- Haben Sie schon mal mit Ihren Kolleg\*innen darüber diskutiert?
- 20) Heute ist es teils kompliziert, sich impfen zu lassen
- Bsp.: HPV – 26 verschiedene kantonale Impfprogramme
  - Bsp.: Schul-Impfprogramme in gewissen aber nicht in allen Kantonen.
    - Gibt es Möglichkeiten, um den Impfprozess in der Schweiz zu vereinfachen?
    - Könnte das Impfen in Apotheken dabei helfen?

### Schlussfolgerung

- 21) Als Schlussfolgerung, was sind Ihre wichtigsten Überlegungen zum Impfen in Apotheken?
- 22) Möchten Sie noch etwas klarstellen/berichtigen? etwas ergänzen? Haben Sie Fragen?
